# Supplementary material for: Engineering of efficiency-enhanced Cas9 and base editors with improved gene therapy efficacies
Source: PubMed Central journal article supplement — Mol Ther. 2022 Nov 30;31(3):744–59. doi: 10.1016/j.ymthe.2022.11.014 (PMC10014233; doi:10.1016/j.ymthe.2022.11.014), 2022-11-30
Supplement: mmc1.pdf [file mmc1.pdf]

**YMTHE, Volume 31**

## **Supplemental Information**

### **Engineering of efficiency-enhanced Cas9 and base editors with improved gene therapy efficacies**

**Shuming Yin, Mei Zhang, Yang Liu, Xiaoyue Sun, Yuting Guan, Xi Chen, Lei Yang, Yanan Huo, Jing Yang, Xiaohui Zhang, Honghui Han, Jiqin Zhang, Min-Min Xiao, Mingyao Liu, Jiazhi Hu, Liren Wang, and Dali Li**

A

| Name   | Length (aa) | Sources                           |
|--------|-------------|-----------------------------------|
| HMGB1  | 215         | <i>Homo sapiens</i>               |
| HMGB2  | 209         | <i>Homo sapiens</i>               |
| HMGB3  | 200         | <i>Homo sapiens</i>               |
| HMGN1  | 100         | <i>Homo sapiens</i>               |
| HMGN2  | 90          | <i>Homo sapiens</i>               |
| HMGI   | 107         | <i>Homo sapiens</i>               |
| HMGI-C | 118         | <i>Homo sapiens</i>               |
| HMGY   | 96          | <i>Homo sapiens</i>               |
| Sso7d  | 64          | <i>Sulfolobus solfataricus P2</i> |
| Sac7d  | 66          | <i>Sulfolobus acidocaldarius</i>  |
| HMG-D  | 112         | <i>Drosophila melanogaster</i>    |

B

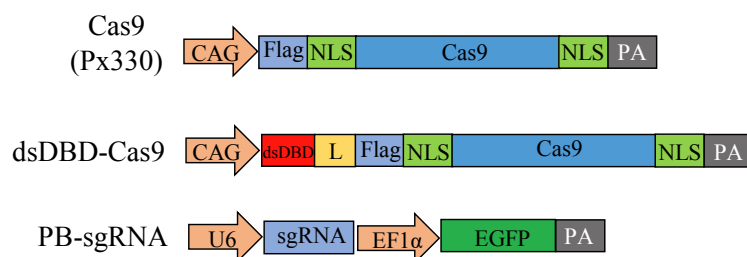

**Figure S1. The information of double-strand DNA binding domains and plasmid designs. (A)** The list of non-sequence-specific double-strand DNA binding domains (dsDBDs); **(B)** The architectures of Cas9, dsDBD-Cas9 and PB-sgRNA. NLS, nuclear localization signal. PA, polyadenylation signal. L, linker.

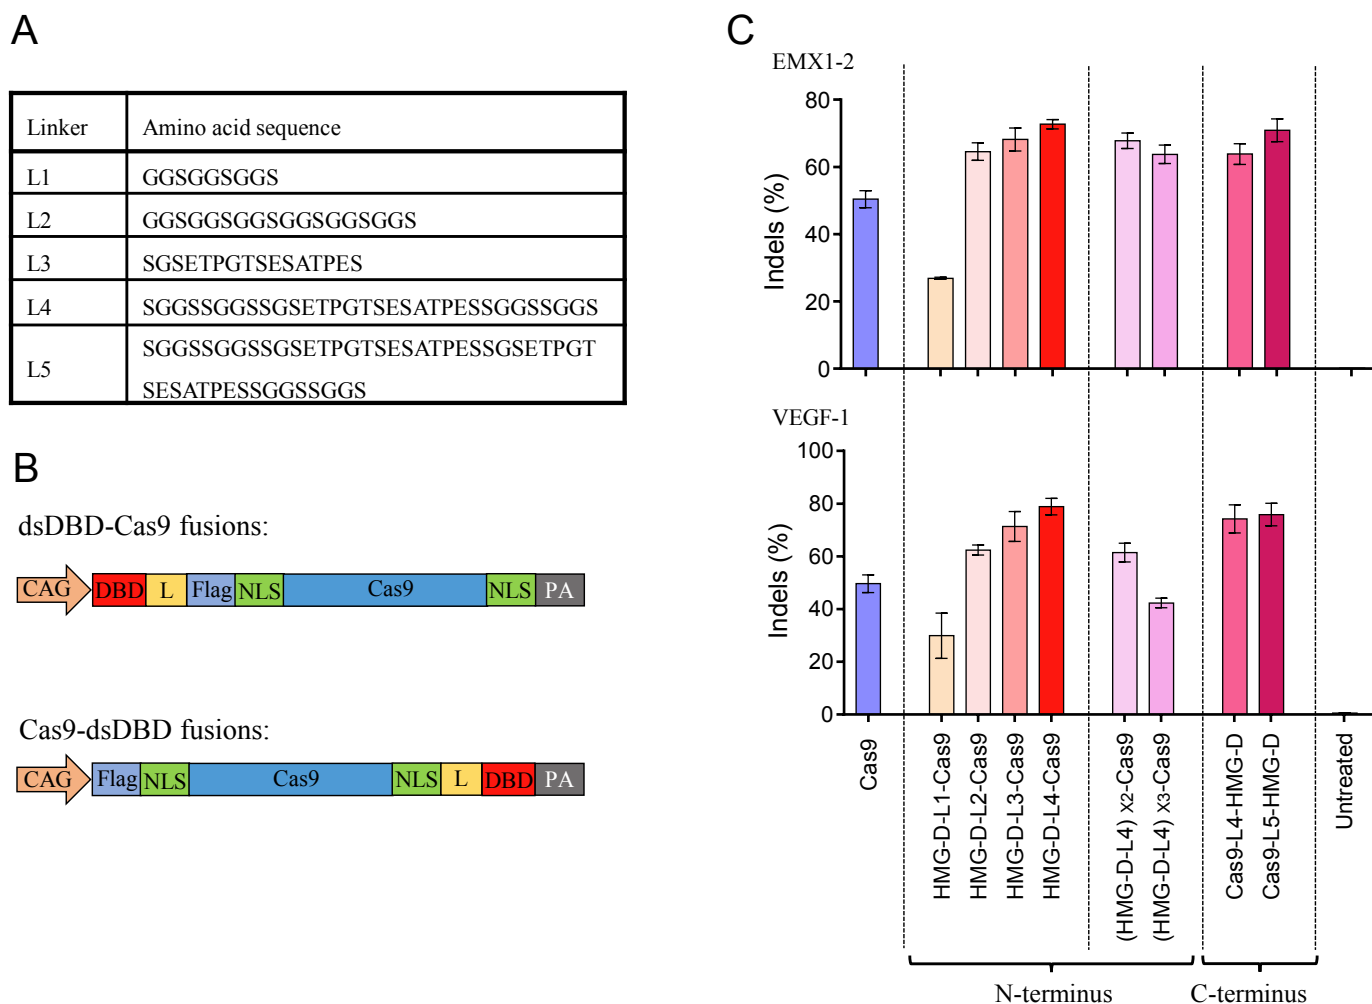

**Figure S2. Optimization of the fusion of Cas9 and HMG-D architecture.** (A) Sequences of linkers L1~L5. (B) The architectures of N-terminal or C-terminal fusion of HMG-D. NLS, nuclear localization signal. PA, polyadenylation signal. L, linker. (C) Quantification of the editing efficiency at EMX1 and VEGF-1 in HEK293T cells. Data represent means $\pm$ s.d. ( $n=3$  independent experiments).

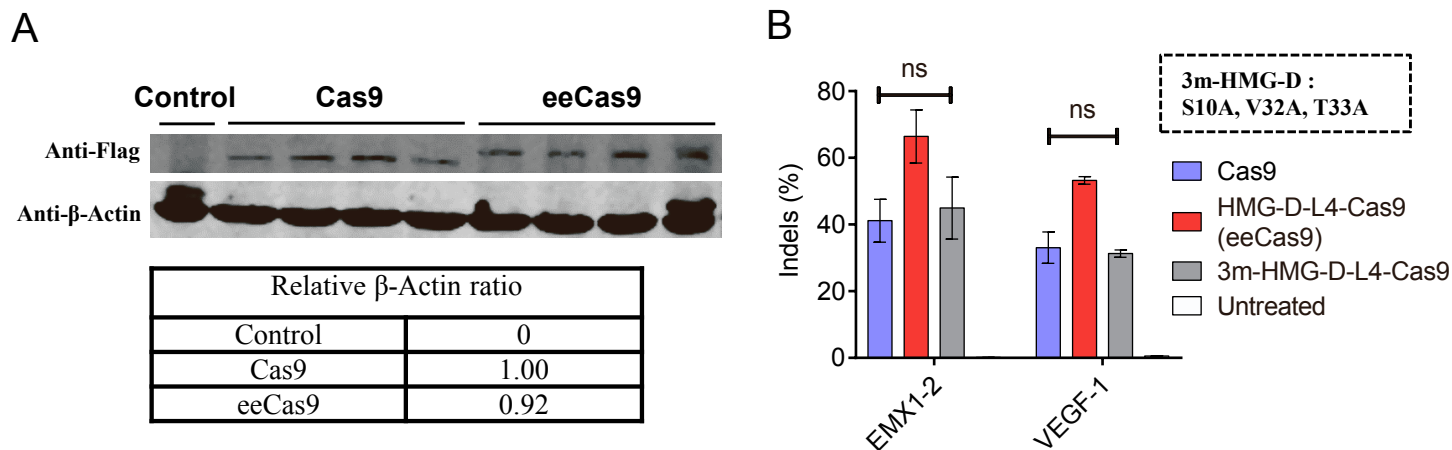

**Figure S3. DNA binding capability of HMG-D is critical to its enhancement effect.** (A) Top, protein expression analysis of Cas9 and eeCas9 by Western Blot. Full length Cas9 and eeCas9 protein were probed with anti-Flag antibody. Bottom, quantification of relative expression levels of Cas9 and eeCas9. The protein levels of Cas9 and eeCas9 was normalized to that of  $\beta$ -Actin in each sample and the average values were calculated. (B) Performance comparison of Cas9, eeCas9, 3m-HMG-D-L4-Cas9 at EMX1-2 and VEGF-1 by HTS analysis. Data represent means  $\pm$  s.d. ( $n=3$  independent experiments). ns, not significant.

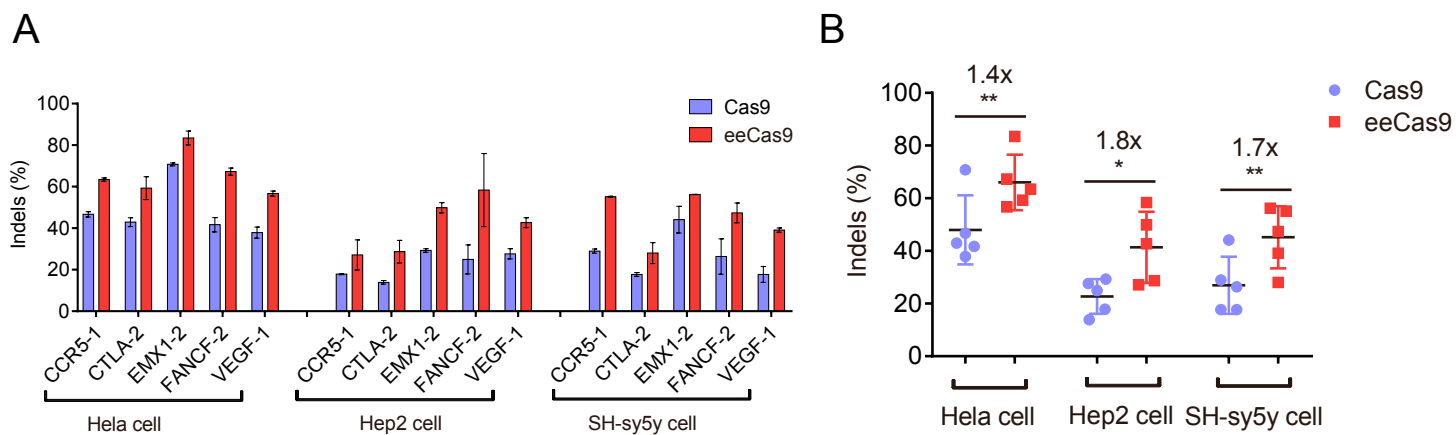

**Figure S4. Evaluation of the gene editing efficiency of Cas9 and eeCas9 in other cell type by HTS analysis. (A)** Five endogenous targets (CCR5-1, CTLA-2, EMX1-2, FANCF-2 and VEGF-1) were tested in HeLa, Hep2, and SH-sy5y cells, respectively. **(B)** Summary of the average gene editing efficiency of Cas9 and eeCas9 at five endogenous targets in fig. A. In all graphs, data represent means  $\pm$  s.d. ( $n=3$  independent experiments). \* $p < 0.05$ . \*\* $p < 0.01$ .

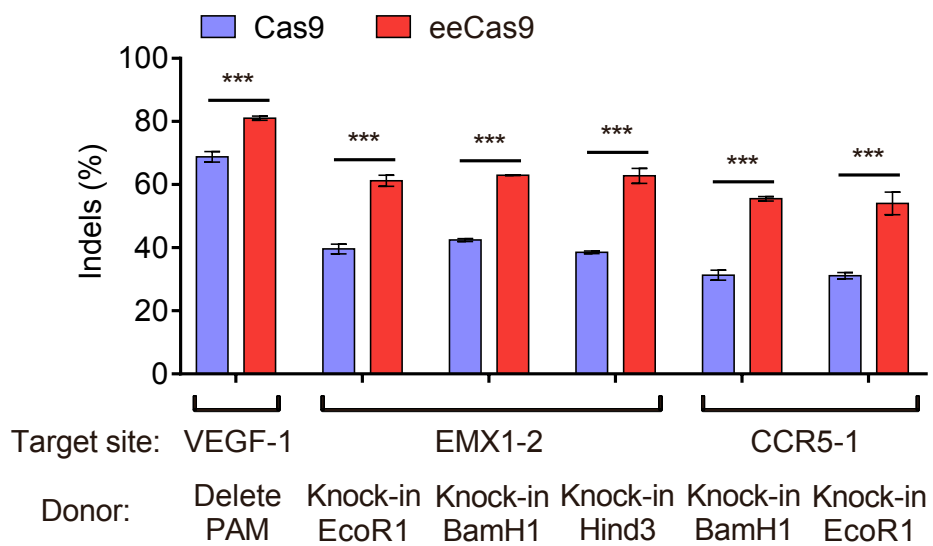

**Figure S5.** The indels frequency caused by Cas9 and eeCas9 when evaluation of HDR efficiency. Data represent means  $\pm$  s.d. ( $n=3$  independent experiments). \*\*\* $p < 0.001$ .

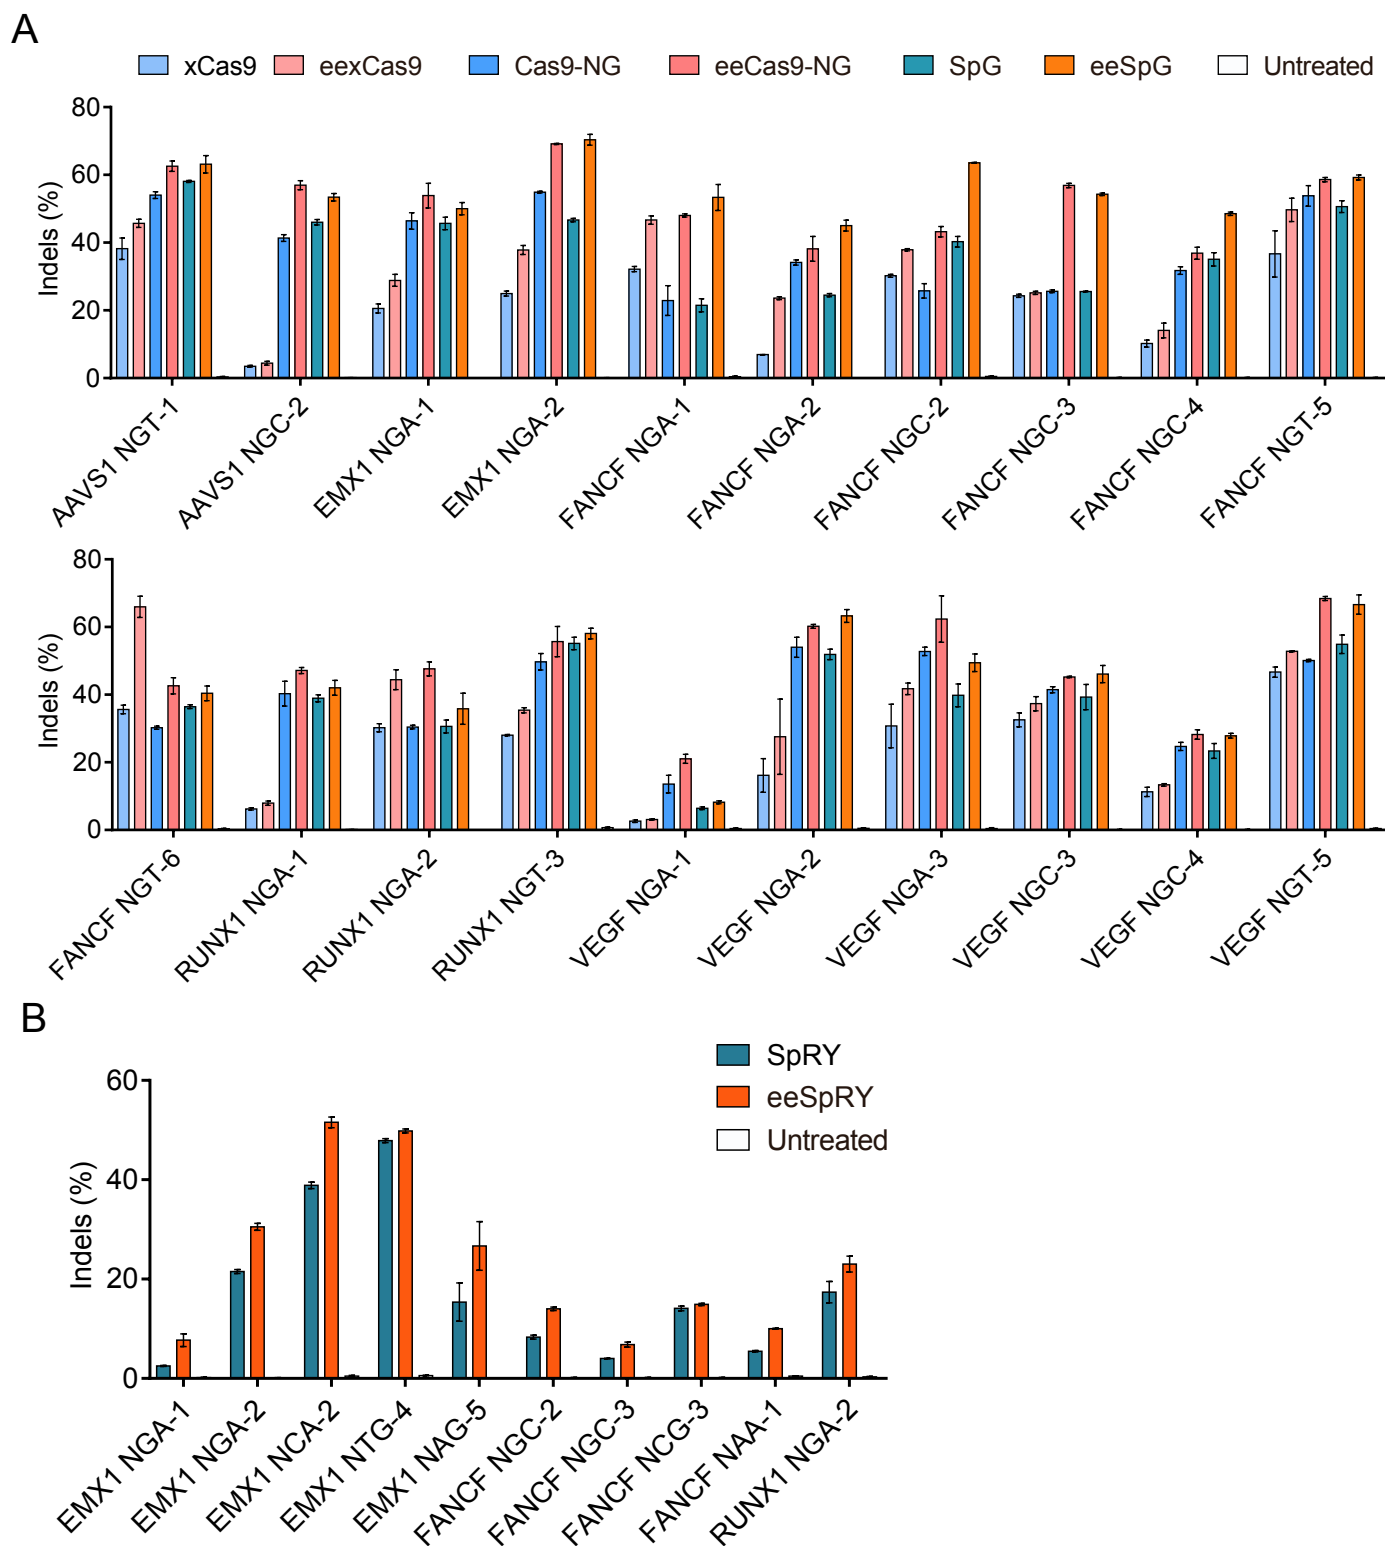

**Figure S6. Evaluation of the gene editing efficiency of various Cas9 variants and eeCas9 variants at endogenous targets for non-NGG PAM. (A)** Evaluation of the gene editing efficiency of xCas9, Cas9-NG, SpG and eexCas9, eeCas9-NG and eeSpG at 20 endogenous targets for non-NGG PAM in HEK293T cells. **(B)** Evaluation of the gene editing efficiency of SpRY and eeSpRY at 10 endogenous targets in HEK293T cells. In all graphs, data represent means  $\pm$  s.d. ( $n=3$  independent experiments).

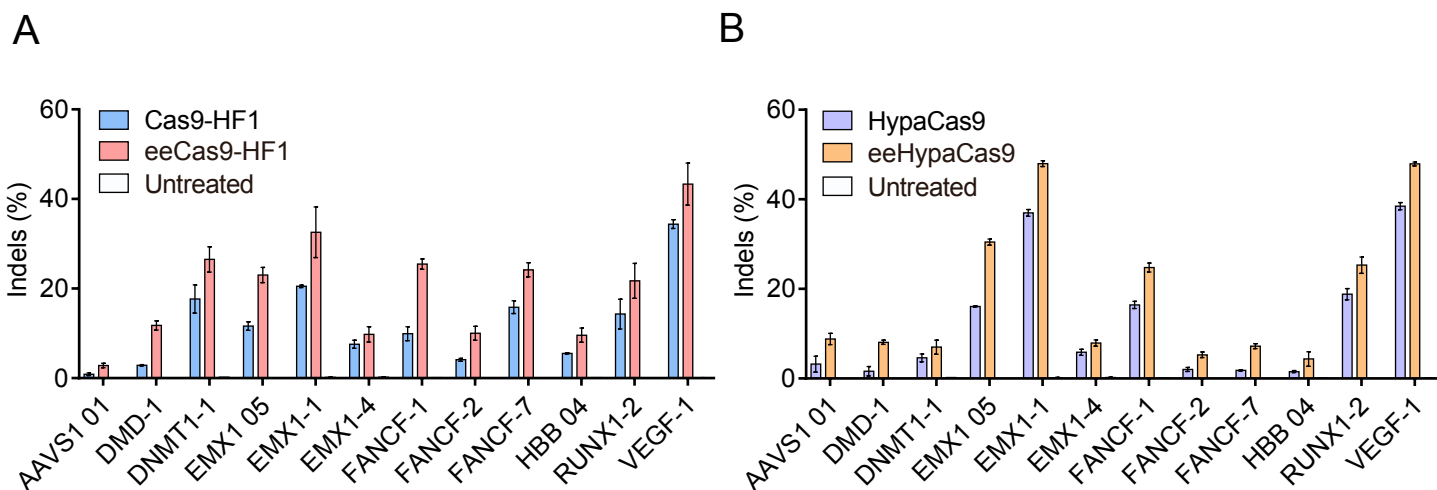

**Figure S7. Evaluation of the gene editing efficiency of two high-fidelity Cas9s with or without HMG-D in HEK293T cells.** (A) Evaluation of the gene editing efficiency of Cas9-HF1 and eeCas9-HF1 at 12 endogenous targets in HEK293T cells. (B) Evaluation of the gene editing efficiency of HypaCas9 and eeHypaCas9 at 12 endogenous targets in HEK293T cells. In all graphs, data represent means  $\pm$  s.d. ( $n=3$  independent experiments).



A

eedCas9-VPR:

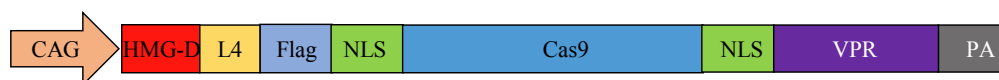

B

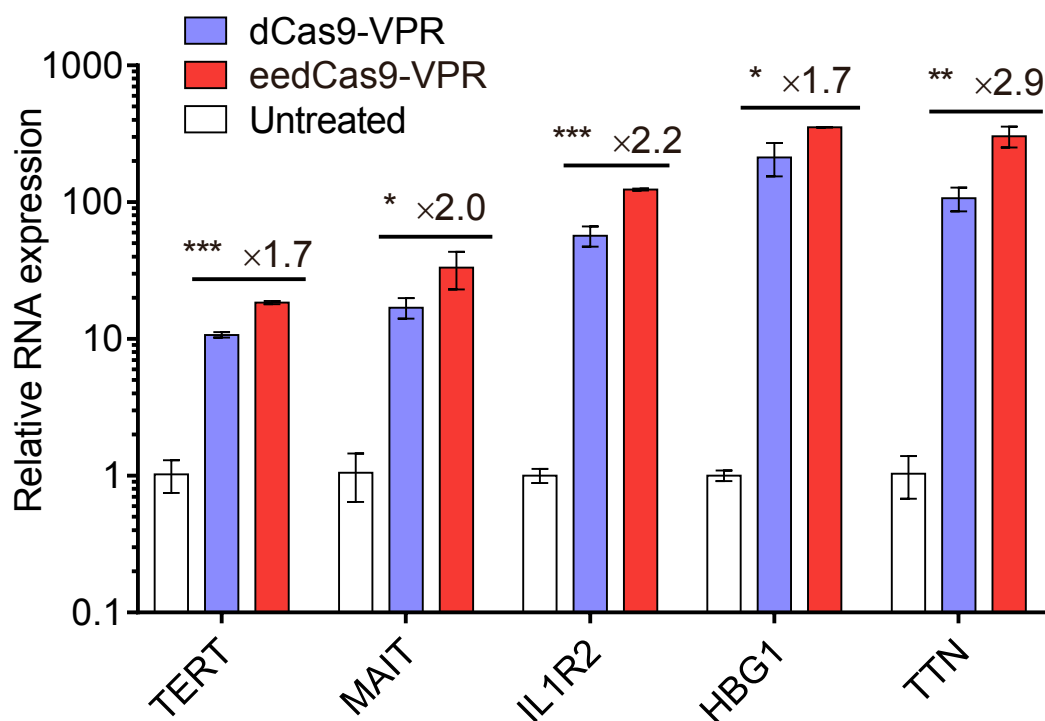

**Figure S8. Development of eedCas9-VPR and evaluation of its gene activation capability in HEK293T cells. (A)** Schematic view of eedCas9-VPR. VPR contains VP64, p65 and RTA. **(B)** Comparison of dCas9-VPR and eedCas9-VPR at five endogenous targets in 293T cells. The number above the bars represent ratio of eedCas9-VPR vs. dCas9-VPR mediated gene activation. All values were normalized to  $\beta$ -actin mRNA expression level. Data represent means  $\pm$  s.d. ( $n=3$  independent experiments). \* $p < 0.05$ , \*\* $p < 0.01$ , \*\*\* $p < 0.001$ .

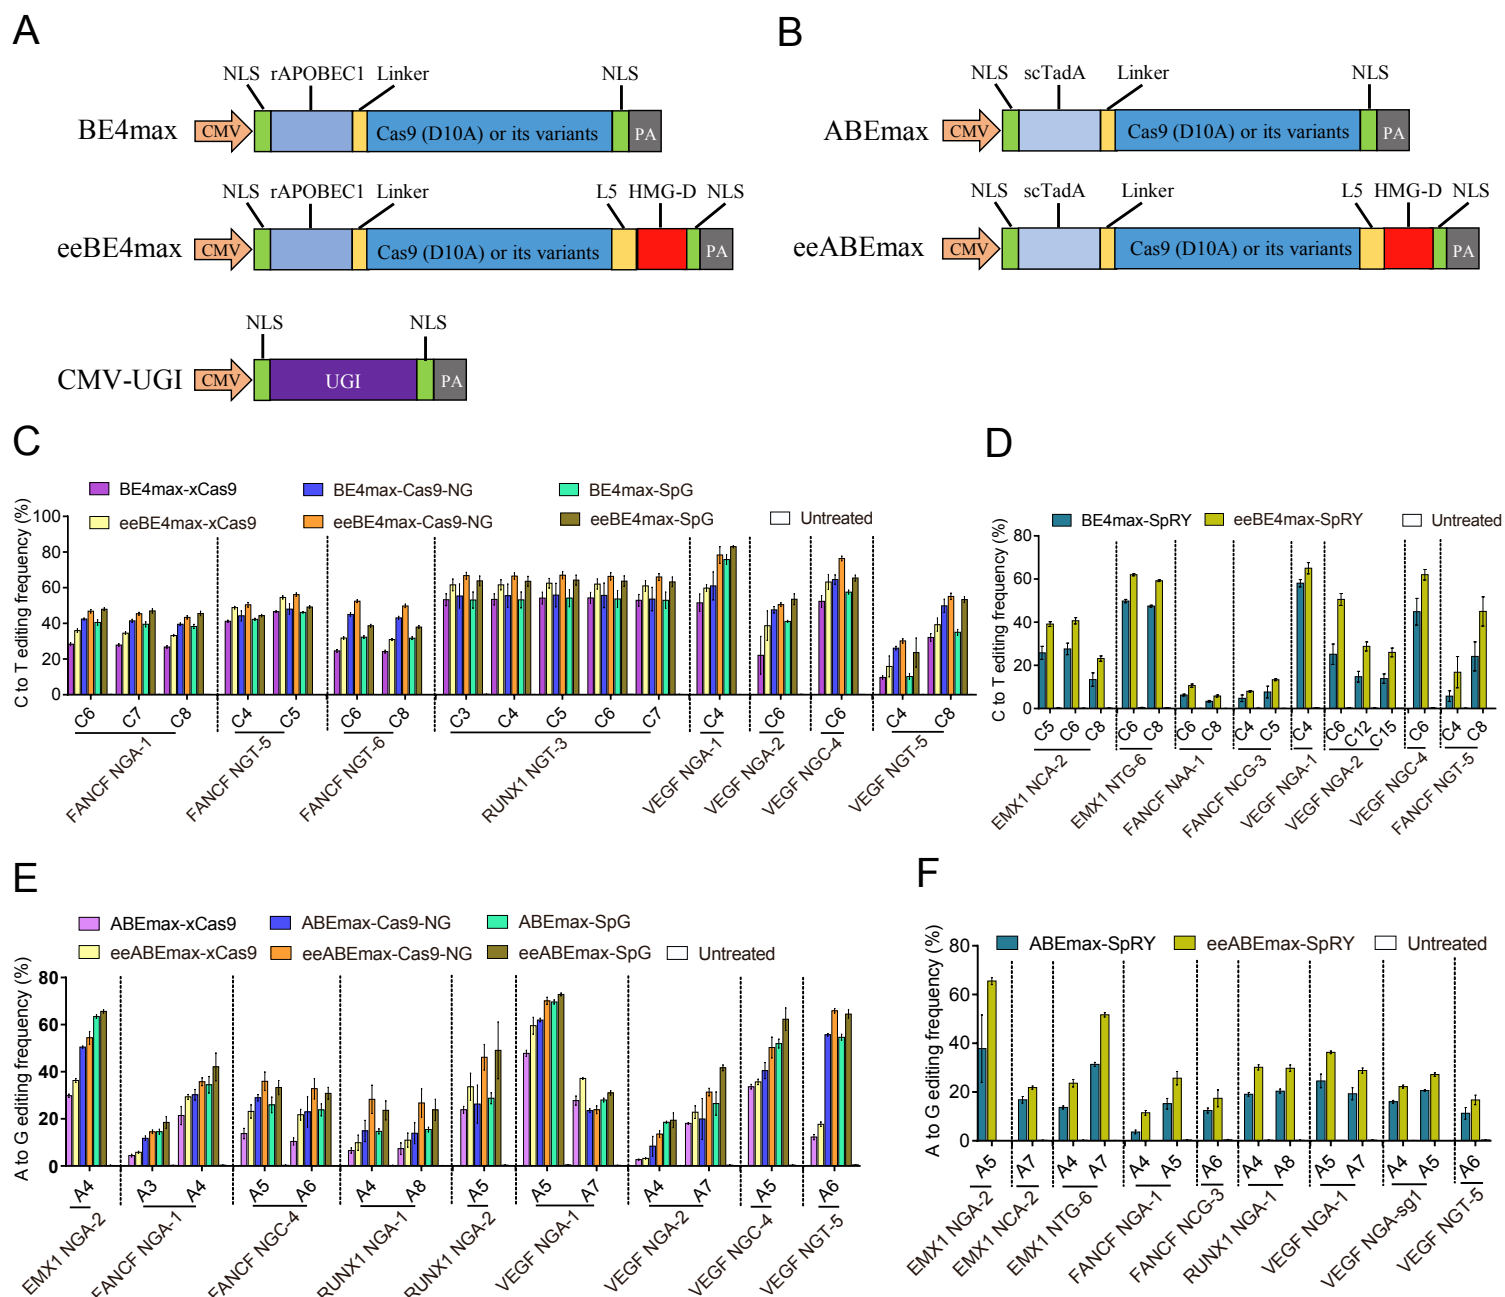

**Figure S9. Evaluation of the base editing efficiency of eeBE4max variants and eeABEmax variants at multiple endogenous target sites. (A)** Architectures of BE4max, eeBE4max and CMV-UGI. **(B)** Architectures of ABEmax and eeABEmax. **(C-D)** Comparison of C-to-T base editing efficiency between BE4max variants and eeBE4max variants at endogenous targets for non-NGG PAM. **(E-F)** Comparison of A-to-G base editing efficiency between ABEmax variants and eeABEmax variants at endogenous targets for non-NGG PAM. Data in graphs C-F represent means  $\pm$  s.d. ( $n=3$  independent experiments).

A

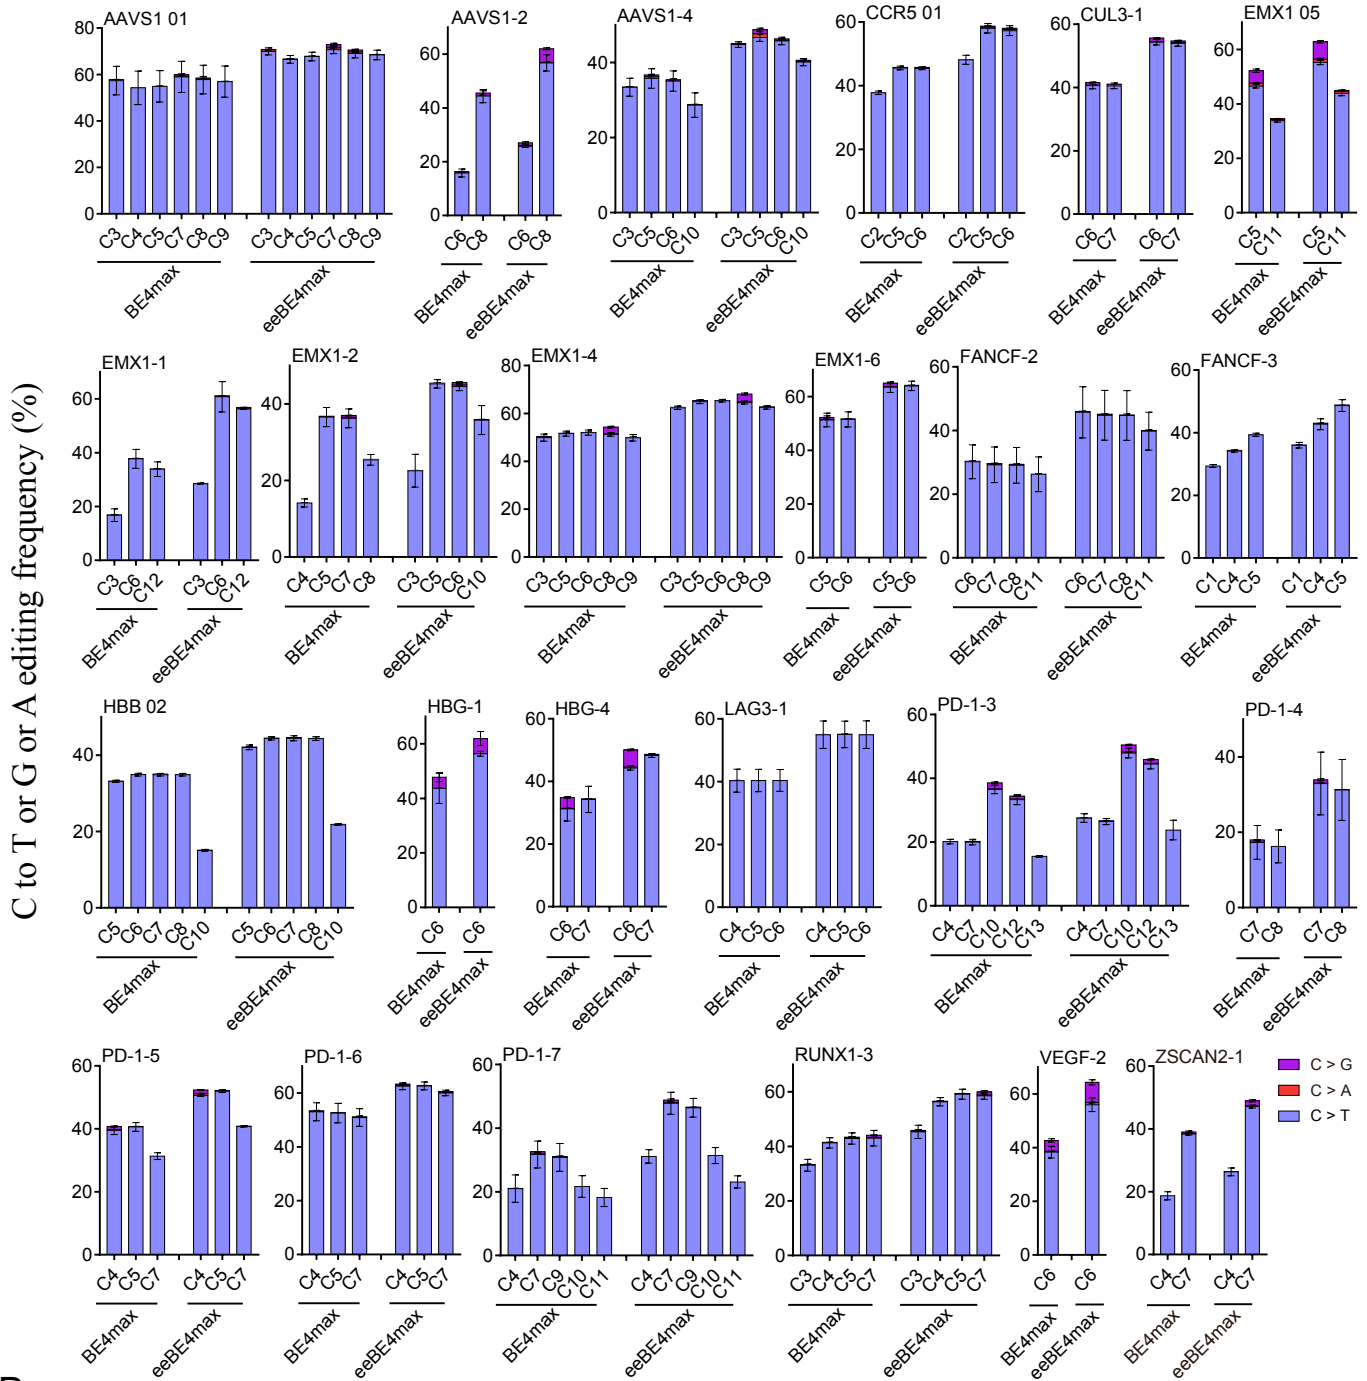

B

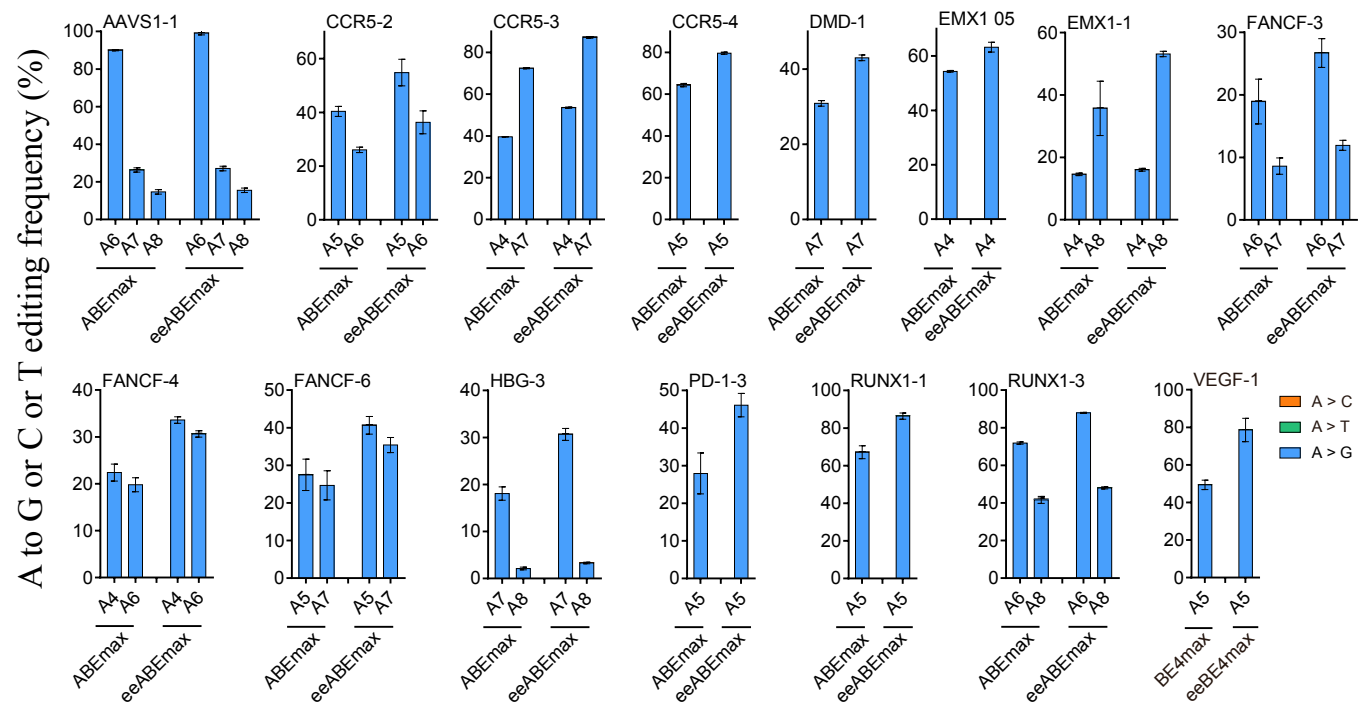

**Figure S10. Comparison of the product purity of multiple base editors.** **(A)** Comparison of the base editing product purity of BE4max and eeBE4max at endogenous targets in 293T cells. C-to-T, C-to-G and C-to-A conversion frequency were analyzed by HTS, respectively. **(B)** Comparison of the base editing product purity of ABEmax and eeABEmax at endogenous targets in 293T cells. A-to-G, A-to-C and A-to-T conversion frequency were analyzed by HTS, respectively. In all graphs, data represent means $\pm$ s.d. ( $n=3$  independent experiments).

A

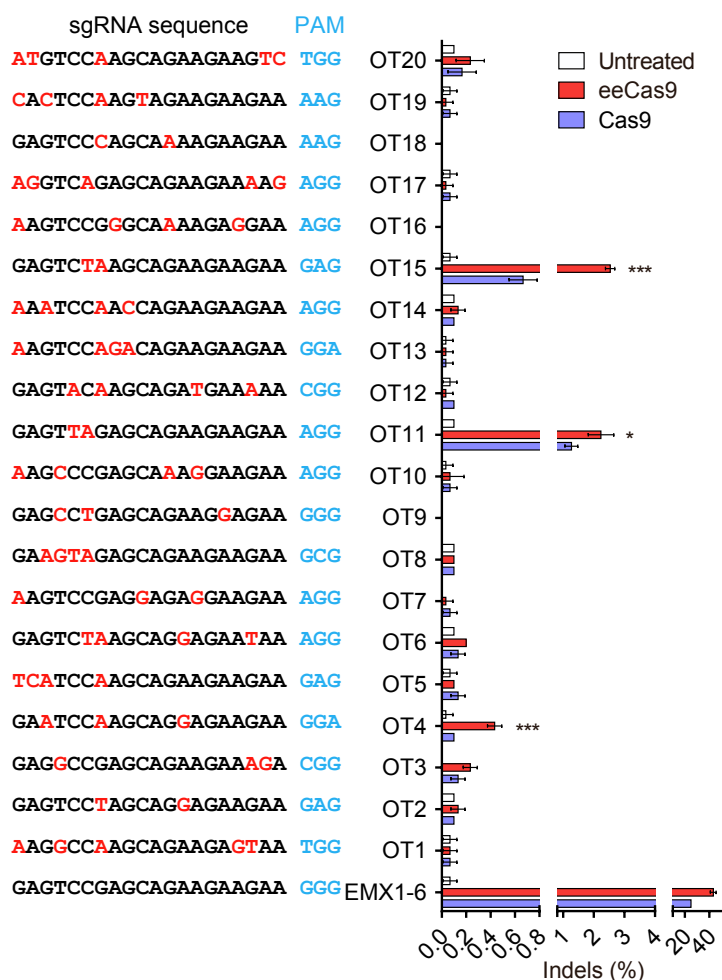

B

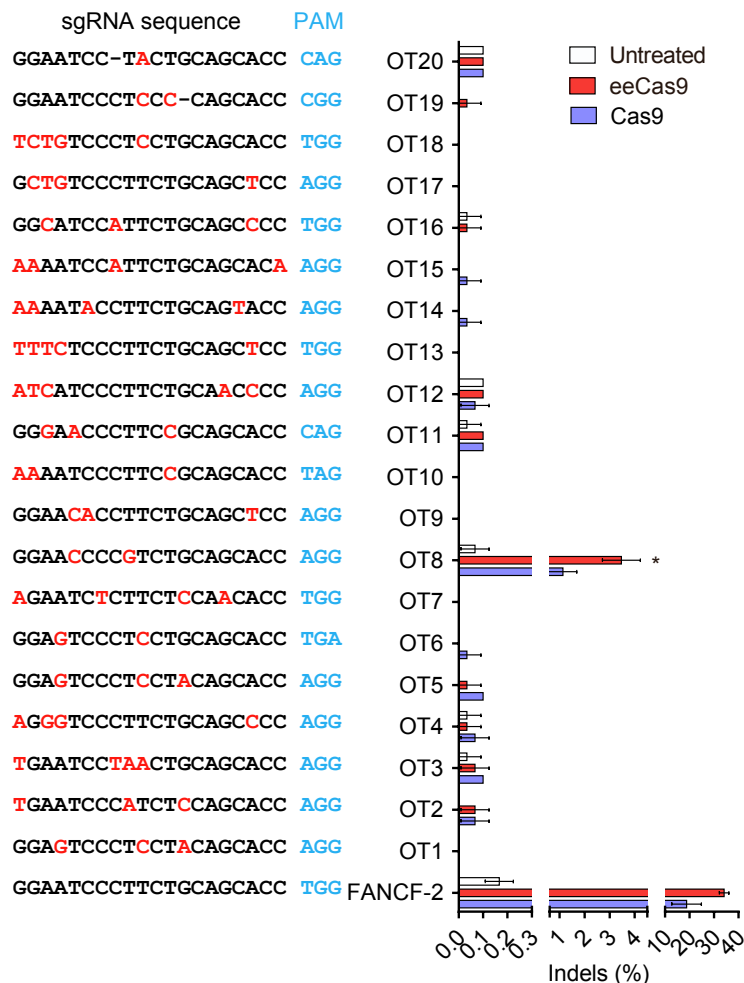

**Figure S11. Evaluation of Cas9 and eeCas9 specificity at predicted off-target sites in 293T cells.** On- and off-targets analysis by Cas9 or eeCas9 at EMX1-6 site (A) or FANCF-2 site (B). Mismatched nucleotides are shown in red. PAM sequences are shown in blue. \* $p < 0.05$ , \*\* $p < 0.01$ . In all graphs, data represent means  $\pm$  s.d. ( $n=3$  independent experiments).

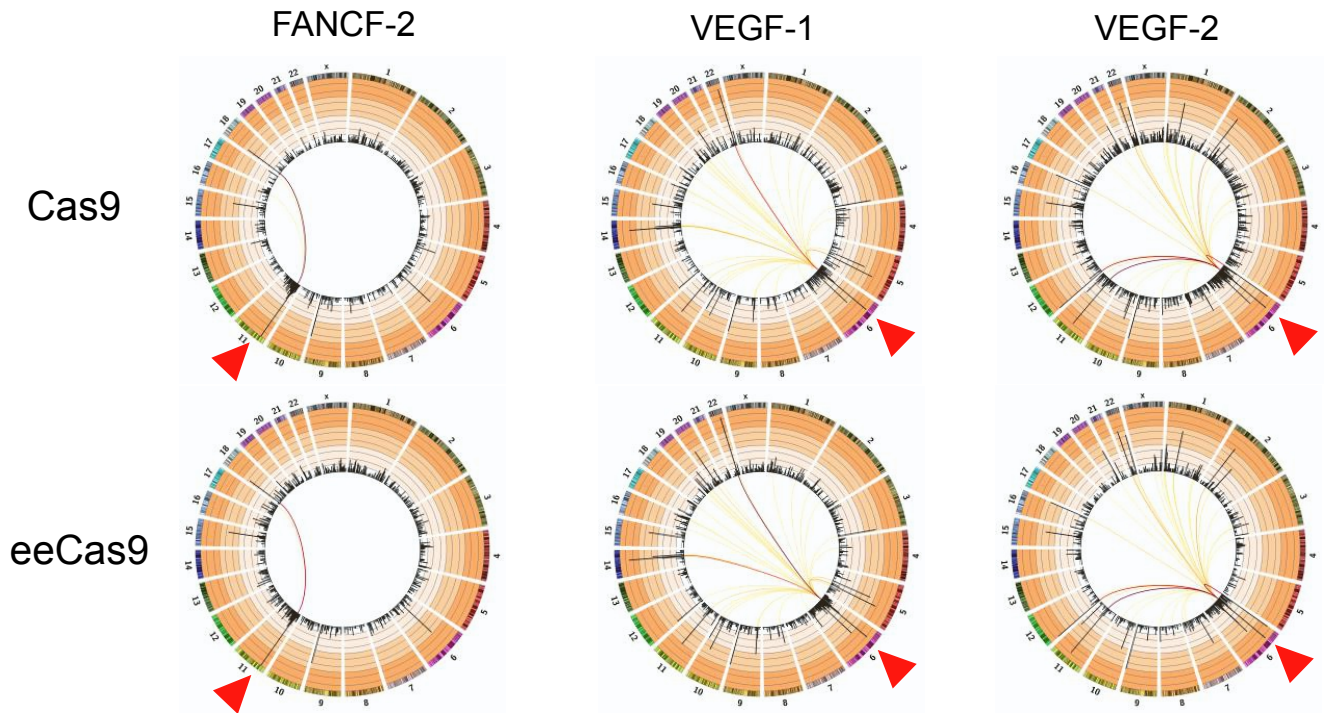

**Figure S12. Evaluation of Cas9 and eeCas9 specificity by PEM-seq analysis.** Circos plots show the off-targets sites of Cas9 and eeCas9 for FANCF-2, VEGF-1 and VEGF-2 target. Red arrows indicated the cleavage site of the indicated targets. Colored lines connected the on-target site to off-target hotspots.

A

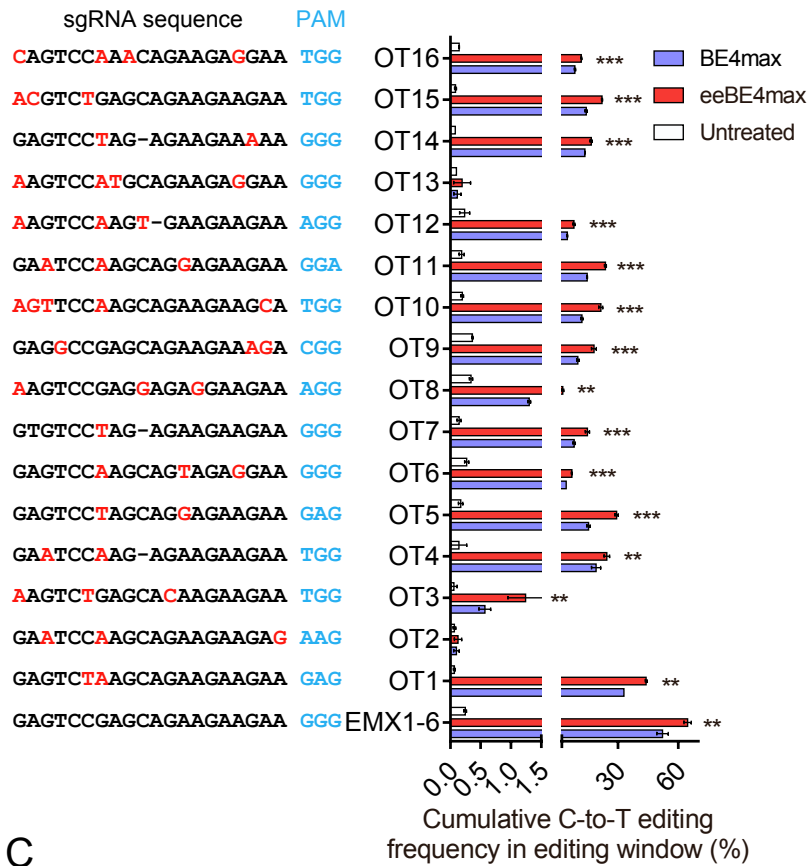

C

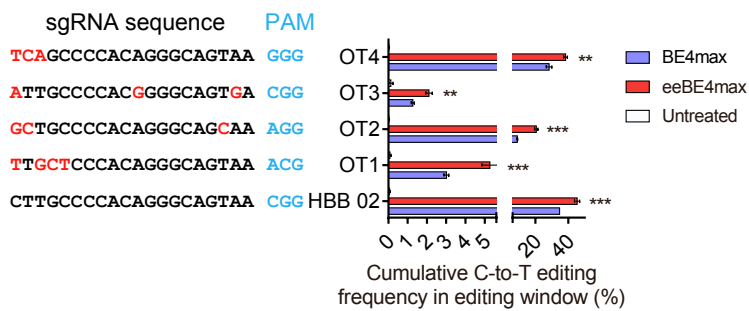

B

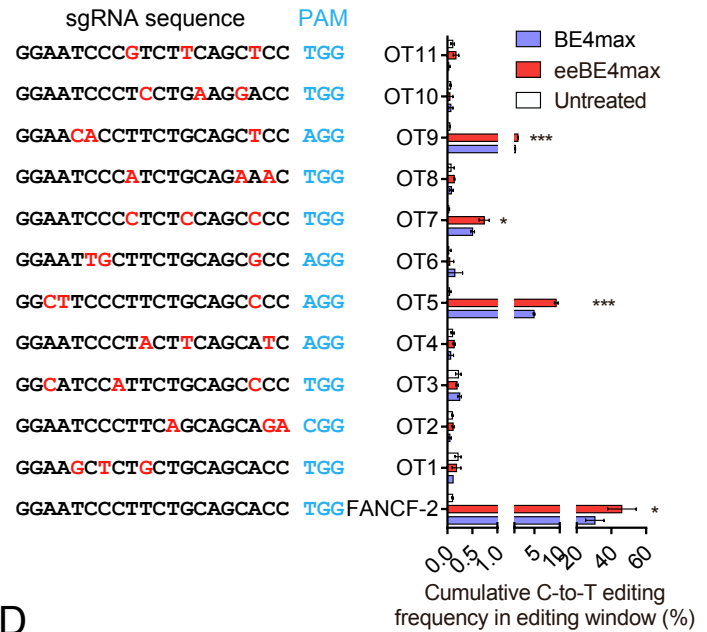

D

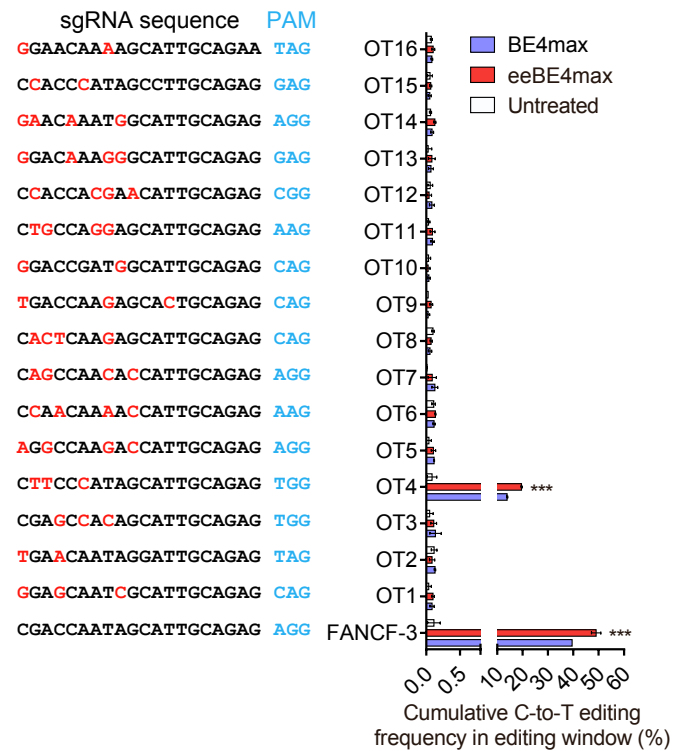

**Figure S13. Evaluation of the off-target efficiency of eeBE4max and BE4max by HTS analysis in 293T cells.** Comparing the off-target efficiency of eeBE4max and BE4max at EMX1-6 (A), FANCF-2 (B), HBB 02 (C) and FANCF-3 (D) target sites. FANCF-3 was web-predicted (<https://www.benchling.com/>) off-target site, the others were previously reported off-target sites. Mismatched nucleotides in off-targets sequence are shown in red. PAM sequences are shown in blue. \* $p < 0.05$ , \*\* $p < 0.01$ , \*\*\* $p < 0.001$ . In all graphs, data represent means  $\pm$  s.d. ( $n=3$  independent experiments).

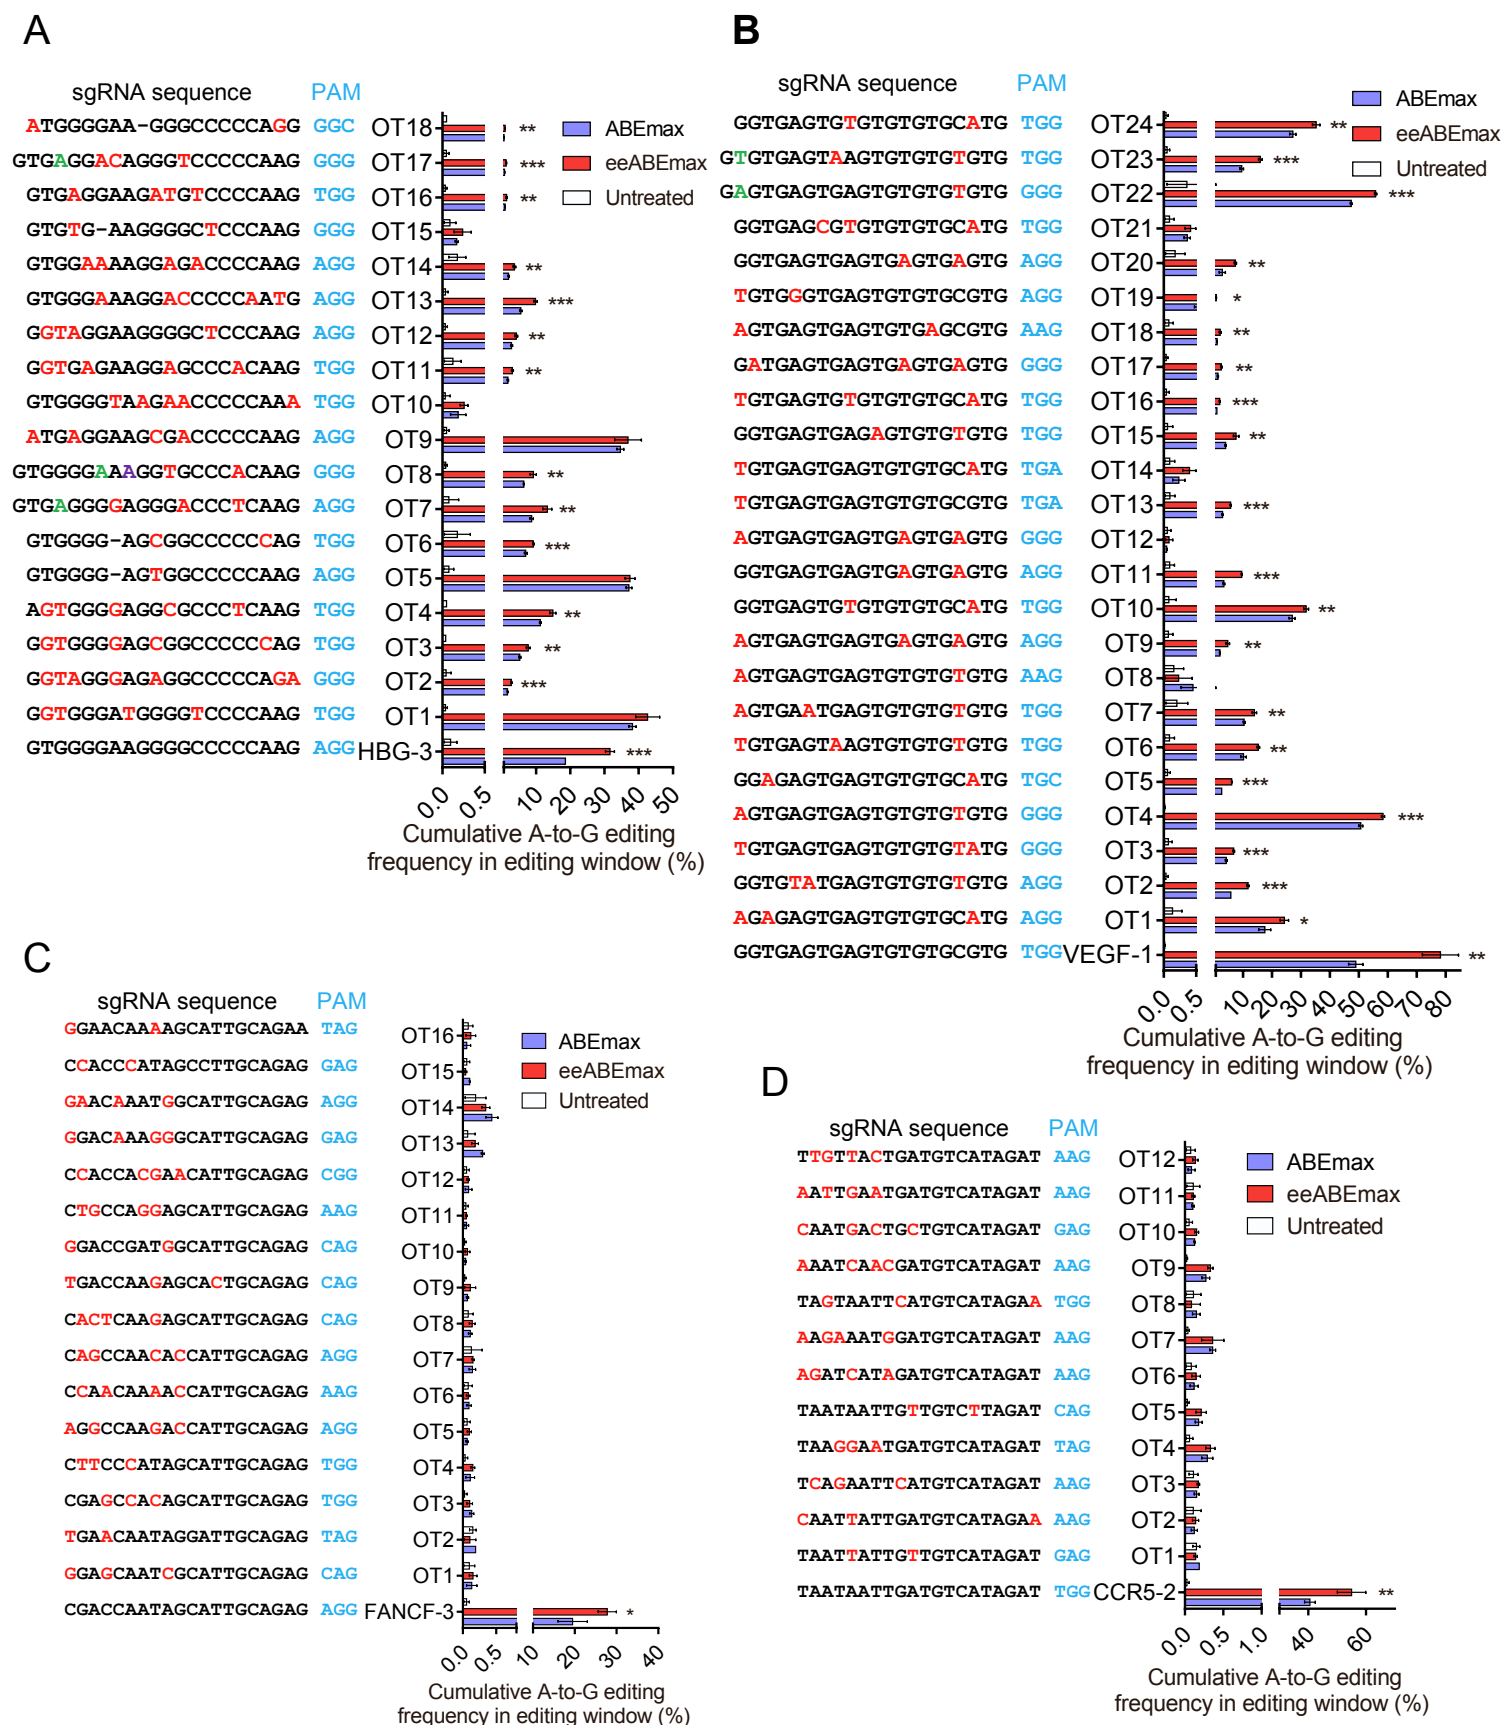



A

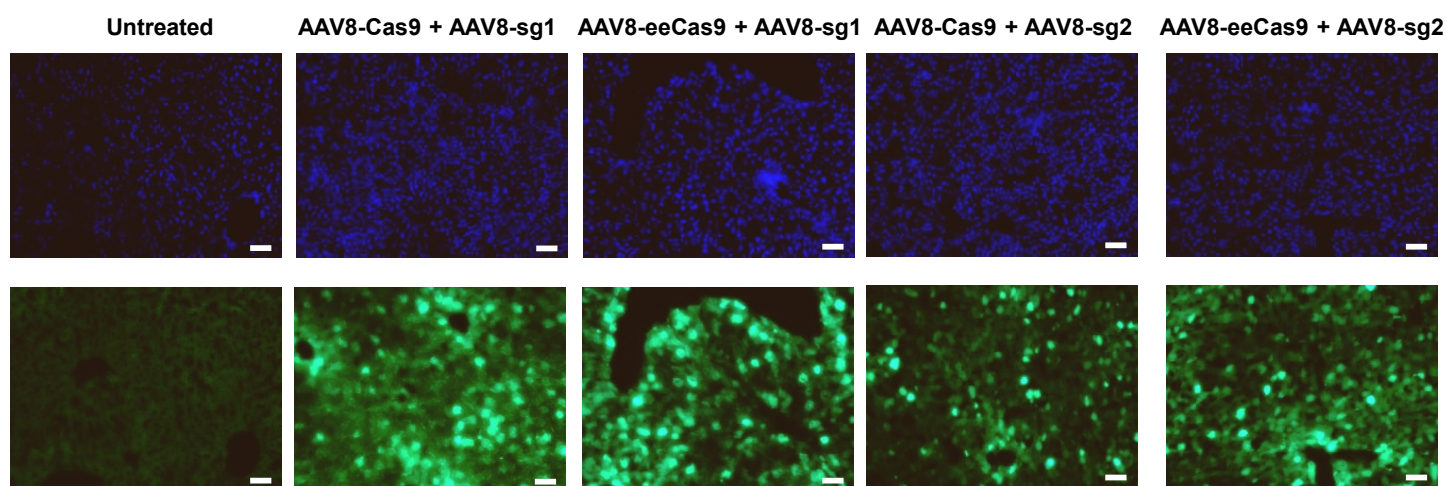

B

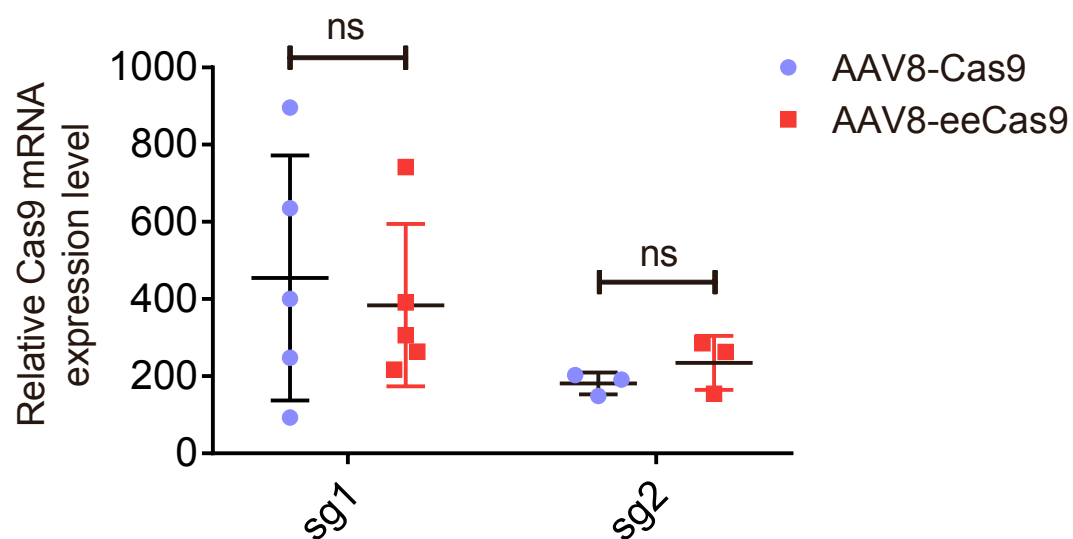

**Figure S15. Evaluation of the viral transduction efficiency and Cas9 expression level of mice liver. (A)** Representative immunofluorescence images from mice liver transduced with AAV. Scale bar: 100μm. **(B)** Comparing the expression levels of eeCas9 and Cas9 in liver by qPCR. Data represent means  $\pm$  s.d. ( $n=3$  independent experiments). ns, not significant.

A

| Mice (ID) | Treatment              | Serum cholesterol(mg dL <sup>-1</sup> ) |       | Indels (%) |
|-----------|------------------------|-----------------------------------------|-------|------------|
|           |                        | 0 d                                     | 35 d  |            |
| 1-5#      | AAV8-Cas9 + AAV8-sg1   | 280.2                                   | 147.9 | 21.5%      |
| 1-4#      |                        | 282.9                                   | 185.0 | 19.8%      |
| 3-6#      |                        | 260.6                                   | 176.8 | 18.7%      |
| 2-11#     |                        | 219.1                                   | 153.4 | 24.2%      |
| 3-5#      |                        | 345.4                                   | 161.6 | 25.8%      |
| 1-1#      |                        | 231.2                                   | 136.9 | 21.4%      |
| 1-2#      | AAV8-ecCas9 + AAV8-sg1 | 249.9                                   | 95.9  | 41.3%      |
| 1-3#      |                        | 261.0                                   | 125.1 | 38.8%      |
| 1-6#      |                        | 216.4                                   | 126.0 | 34.3%      |
| 3-7#      |                        | 258.2                                   | 90.4  | 40.5%      |
| 2-8#      |                        | 166.6                                   | 115.0 | 35.7%      |
| 2-15#     |                        | 338.8                                   | 120.5 | 39.8%      |
| 3-1#      | Untreated              | 331.8                                   | 299.2 | 0.1%       |
| 3-2#      |                        | 336.9                                   | 282.1 | 0.0%       |
| 3-3#      |                        | 268.4                                   | 323.2 | 0.0%       |
| 2-2#      |                        | 213.6                                   | 249.2 | 0.2%       |
| 2-3#      |                        | 261.1                                   | 350.9 | 0.1%       |

B

| Mice (ID) | Treatment              | Serum cholesterol(mg dL <sup>-1</sup> ) |       | Indels (%) |
|-----------|------------------------|-----------------------------------------|-------|------------|
|           |                        | 0 d                                     | 35 d  |            |
| 1#        | AAV8-Cas9 + AAV8-sg2   | 387.1                                   | 208.3 | 13.1%      |
| 2#        |                        | 259.6                                   | 195.2 | 13.5%      |
| 8#        |                        | 256.0                                   | 221.5 | 10.2%      |
| 7#        | AAV8-ecCas9 + AAV8-sg2 | 356.1                                   | 97.0  | 29.2%      |
| 1-2#      |                        | 245.3                                   | 64.6  | 33.8%      |
| 2-4#      |                        | 289.5                                   | 142.5 | 31.6%      |
| WT-1#     | Untreated              | 259.0                                   | 255.0 | 0.0%       |
| WT-2#     |                        | 365.3                                   | 309.0 | 0.1%       |
| WT-3#     |                        | 324.1                                   | 259.8 | 0.0%       |

**Figure S16. Evaluation of the gene editing efficiency and therapeutic efficacy for targeting Pcsk9-1 or Pcsk9-2 site of *Pcsk9* gene in adult mice.** (A) Summary of the serum cholesterol levels and the indels frequencies of each mice for Pcsk9-1 site. (B) Summary of the serum cholesterol levels and the indels frequencies of each mice for Pcsk9-2 site. Indel frequencies in graphs A and B were determined by HTS.

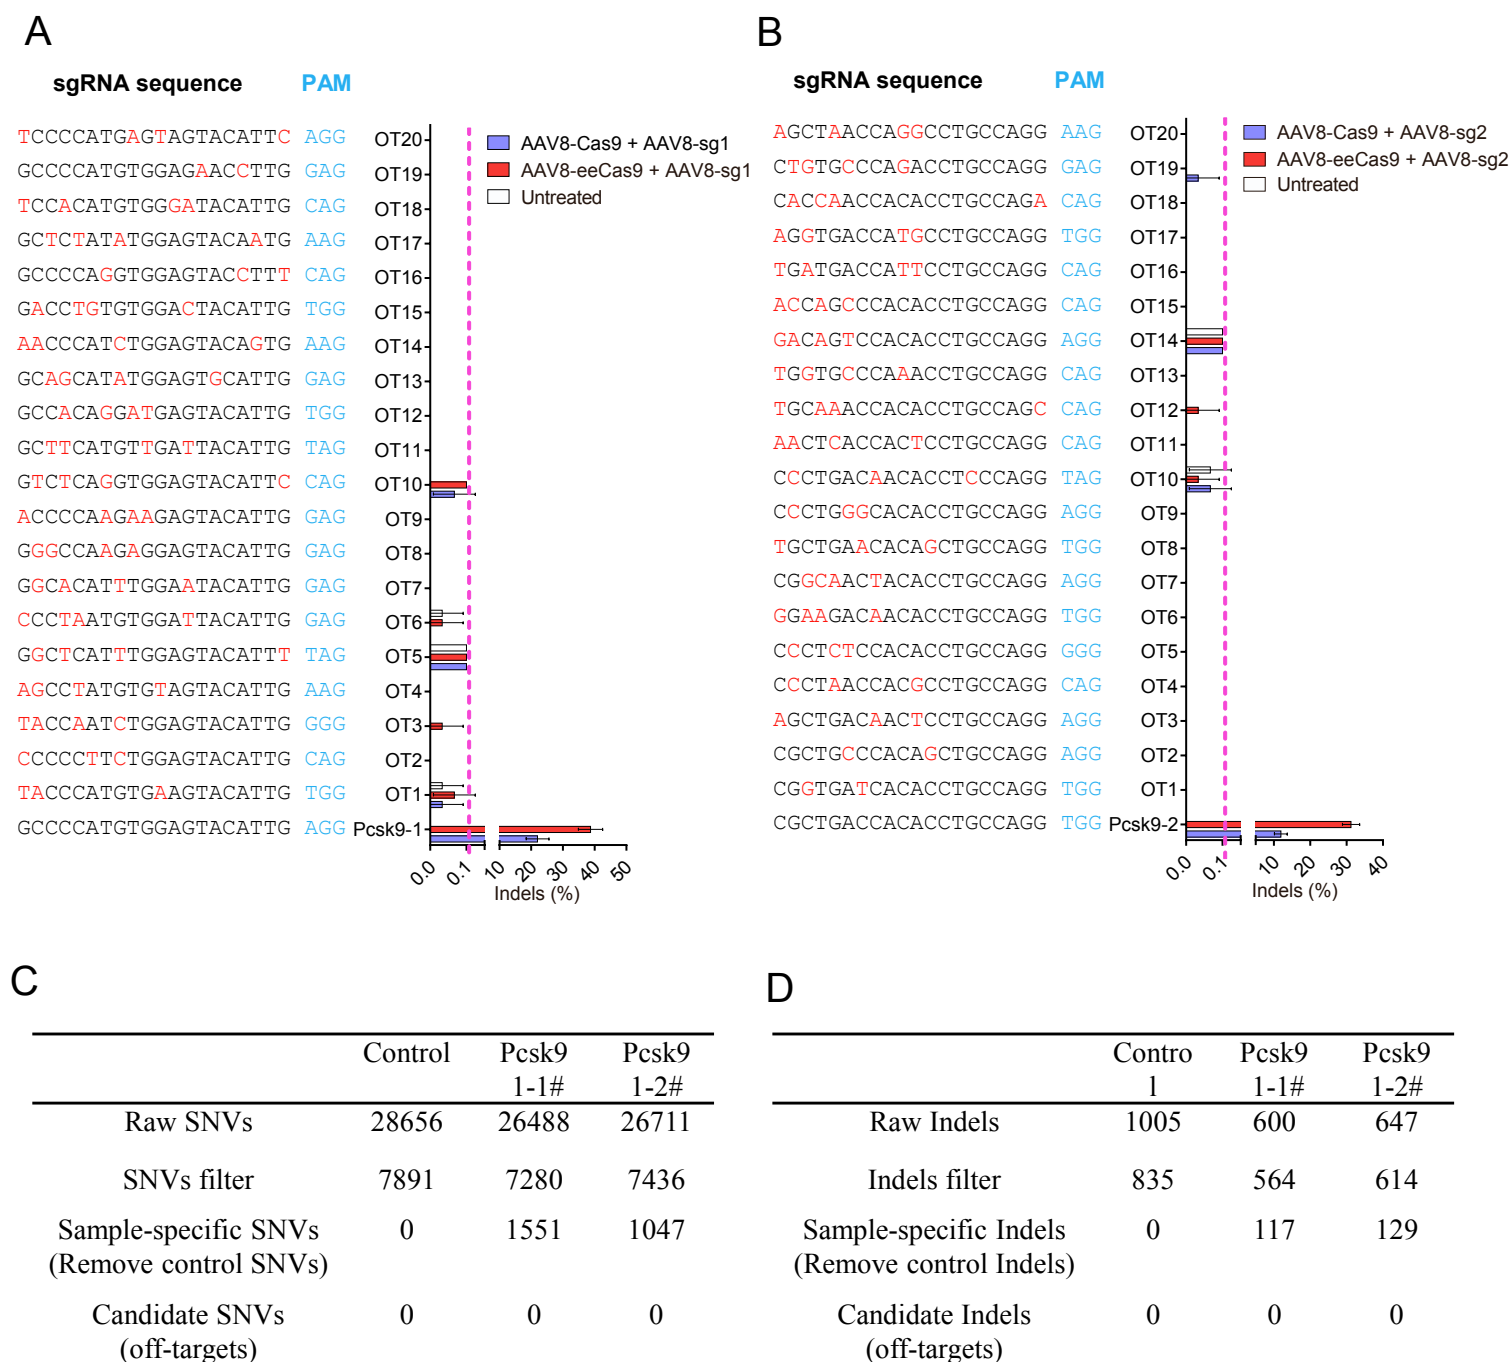

**Figure S17. Analysis of the off-target effects for mice treated with Cas9 or eeCas9 virus. (A-B)** DNA on-target and off-target efficiency of Pcsk9-1 (A) and Pcsk9-2 (B) target site was determined by HTS. The PAM sequences are shown in blue. The mismatched nucleotides are shown in red. In all graphs, data represent means  $\pm$  s.d. ( $n=3$  independent experiments). (C-D) Summary of the number of indels and SNVs detected by PEM-seq.

**Supplementary Table 1. Amino acid sequences of double-stranded DNA binding domains (dsDBDs).**

| Name   | Amino acid sequence                                                                                                                                                                                                                | Origin                         |
|--------|------------------------------------------------------------------------------------------------------------------------------------------------------------------------------------------------------------------------------------|--------------------------------|
| HMGB1  | MGKGDPPKPRGKMSSYAFFVQTCREEHKKKHPDASVNFSEFSKCSERWKTMSAK<br>EKGKFEDMAKADKARYEREMKTYIPPKGETKKKFKDPNAPKRPPSAFFLFCSEYRP<br>KIKGEHPGLSIGDVAKKLGEMWNNNTAADDKQPYEKKAALKLEKYEKDIAAYRAKG<br>KPDAAKKGVVKAESKSKKKEEEEEDEEEDDEEEDDEEEDDEEEDDDDE | <i>Homo sapiens</i>            |
| HMGB2  | MGKGDPNKPRGKMSSYAFFVQTCREEHKKKHPDSSVNFSEFSKCSERWKTMSAK<br>EKSKFEDMAKSDKARYDREMKNYVPPKGDKKGKKKDPNAPKRPPSAFFLFCSEHR<br>PKIKSEHPGLSIGDTAKKLGEMWSEQSAKDKQPYEQKAAALKLEKYEKDIAAYRAKG<br>KSEAGKKGPRPTGSKKKNEPEDEEEEEDEEEDDEEEDDEE         | <i>Homo sapiens</i>            |
| HMGB3  | MAKGDPPKPKGKMSAYAFFVQTCREEHKKKNPEVPVNFSEFSKCSERWKTMSGK<br>EKSKFEDMAKADKVRDREMMDYGPAGKGGKKKDPNAPKRPPSGFFLFCSEFRPKI<br>KSTNPGISIGDVAKKLGEMWNNLNDSEKQPYITKAAALKLEKYEKDVADYKSKGKFD<br>GAKGPAKVARKKVEEEDDEEEEEEEEEEEEEDEE               | <i>Homo sapiens</i>            |
| HMGN1  | MPKRKVSSAEGAAKEEPKRRSARLSAKPPAKVEAKPKAAAKDKSSDKKVQTKGK<br>RGAKGKQAEVANQETKEDLPAENGETKTEESPASDEAGEKEAKSD                                                                                                                            | <i>Homo sapiens</i>            |
| HMGN2  | MPKRKAEGDAKGDKAKVKDEPQRRSARLSAKPAPPKPEPKPKAPAKKGEKVPKG<br>KKGKADAGKEGNPAENGDAKTDQAQKAEGAGDAK                                                                                                                                       | <i>Homo sapiens</i>            |
| HMGI   | MSESSSKSSQPLASKQEKDGTGTEKRGRPRKQPPVSPGTALVGSQKPESEVPTPKRPR<br>GRPKGSKNKGAATRKTTPGRKPRGRPKKLEKEEEEEGISQESSEEEQ                                                                                                                      | <i>Homo sapiens</i>            |
| HMGI-C | MSARGEGAGQPSTSAQGQPAAPQKRGRGRPRKQQQEPTGEPSPKRPRGRPKGSK<br>NKSPSKAAQKKAATGEKRPRGRPRKWPQVQVQKKPAQVNVALPGKDHGPNLIYL<br>LFSKNAT                                                                                                        | <i>Homo sapiens</i>            |
| HMGY   | MSESSSKSSQPLASKQEKDGTGTEKRGRPRKQPPKPESEVPTPKRPRGRPKGSKNKG<br>AAKTRKTTPGRKPRGRPKKLEKEEEEEGISQESSEEEQ                                                                                                                                | <i>Homo sapiens</i>            |
| Sso7d  | MATVKFKYKGEKEVDISKIKKVVWRVGMISFTYDEGGGKTGRGAVSEKDAPKELL<br>QMLEKQKK                                                                                                                                                                | <i>Sulfolobus sp.</i>          |
| Sac7d  | MVKVKFKYKGEKEVDTSKIKKVVWRVGMVFTYDDNGKTGRGAVSEKDAPKEL<br>LDMLARAEREKK                                                                                                                                                               | <i>Sulfolobus sp.</i>          |
| HMG-D  | MSDKPKRPLSAYMLWLNARSISIKRENPGIKVTEVAKRGGELWRAMKDKSEWEAK<br>AAKAKDDYDRAVKEFEANGSSAANGGAKKRAKPAKKVAKKSKKEEDEDDEDD<br>ESE                                                                                                             | <i>Drosophila melanogaster</i> |

**Supplementary Table 2. List of on-target sites and HTS primer sequences.**

See in Supplemental Spreadsheet.

### Supplementary Table 3. List of synthetic ssODN sequences.

| Name                  | Sequence (5'-3')                                                                               |
|-----------------------|------------------------------------------------------------------------------------------------|
| VEGF-1 delete PAM     | G*T*GAGGACGTGTGTCTGTGTGGGTGAGTGAGTGTGTGGGTTGAGGGCGTTGGAGCGGGGAGAAGGCC<br>AGGGGTCA*C*T          |
| EMX1-2 knock-in EcoR1 | G*A*AGGGCCTGAGTCCGAGCAGAAGAAGAAGGGCTCCCATCGAATTCACATCAACCGGTGGCGCATTGCCA<br>CGAAGCAGGCCAAT*G*G |
| EMX1-2 knock-in BamH1 | G*A*AGGGCCTGAGTCCGAGCAGAAGAAGAAGGGCTCCCATCGGATCCACATCAACCGGTGGCGCATTGCCA<br>CGAAGCAGGCCAAT*G*G |
| EMX1-2 knock-in Hind3 | G*A*AGGGCCTGAGTCCGAGCAGAAGAAGAAGGGCTCCCATCAAGCTTACATCAACCGGTGGCGCATTGCCA<br>CGAAGCAGGCCAAT*G*G |
| CCR5-1 knock-in BamH1 | T*A*TCAAGTGTC AAGTCCAATCTATGACATCAATTATTATAGGATCCCATCGGAGCCCTGCCAAAAATCAAT<br>GTGAAGCAAATC*G*C |
| CCR5-1 knock-in EcoR1 | T*A*TCAAGTGTC AAGTCCAATCTATGACATCAATTATTATAGAATTCATCGGAGCCCTGCCAAAAATCAAT<br>GTGAAGCAAATC*G*C  |

### Supplementary Table 4. List of off-target sites and HTS primers.

See in Supplemental Spreadsheet.

### Supplementary Table 5. List of qPCR primer sequences.

| Name  | Forward primer          | Reverse primer       |
|-------|-------------------------|----------------------|
| HBG1  | AGATGCTGGAGGAGAAACCC    | AGGTGCCCTTGAGATCATCC |
| IL1R2 | AGCTTCTCTGGGGTCAAGACT   | TCTCAACAGAAGACCCTGGC |
| MAIT  | TGGCTGGGGTTTGAACCTTT    | AGGAAGCTGTTCCAGACTGC |
| TERT  | CAGAGCCAGTCTCACCTTCA    | ACATGCGTGAAACCTGTACG |
| TTN   | TGTTGCCACTGGTGCTAAAG    | ACAGCAGTCTTCTCCGCTTC |
| Cas9  | ACAATCTGACCAAGGCCGAG    | TTCCGGAATCGGACACCAG  |
| Actin | CGTCATACTCTGCTTGCTG     | GTACGCCAACACAGTTGCTG |
| HBG   | GGTTATCAATAAGCTCCTAGTCC | ACAACCAGGAGCCTTCCCA  |
| HBA   | GCCCTGGAGAGGATGTTCT     | TTCTTGCCGTGGCCCTTA   |

### Supplementary Table 6. List of AAV vectors and sequences.

**ITR** **miniCMV** **Cas9 or eeCas9** **short PolyA**

AAV8-Cas9:

**CCTGCAGGCAGCTGCGCGCTCGCTCGCTCACTGAGGCCGCCCGGGCAAAGCCCGGGCGTCGGGGCACCTTTGGTTCGCCGGCCCTAG**

TGAGCGAGCGAGCGCAGAGAGGGAGTGGCCAACCTCCATCACTAGGGGTTCTTGGCGCCGTAGCGACTCACGGGGATTTCGAAGT  
CTCCACCCCATTGACGTCAATGGGAGTTTGTTTTGGCACCAAAATCAACGGGACTTTCCAAAATGTCGTAACAACCTCCGCCCCATTGAC  
GCAAATGGGCGGTAGGCGTGTACGGTGGGAGGTCTATATAAGCAGAGCTCGTTTAGTGAACCGTCAGATCCCGCGCCACCGGTGCCA  
CCATGACTATAAGGACCACGACGGAGACTACAAGGATCATGATATTGATTACAAAGACGATGACGATAAGATGGCCCCAAAGAAGAAG  
CGGAAGGTCGGTATCCACGGAGTCCAGCAGCCGACAAGAAGTACAGCATCGGCCTGGACATCGGCACCAACTCTGTGGGTGGGCC  
GTGATCACCGACGAGTACAAGGTGCCAGCAAAATTAAGGTGCTGGGCAACACCGACCGGCACAGCATCAAGAAGAACCTGATC  
GGAGCCCTGCTGTTCGACAGCGGCGAAACAGCCGAGGCCACCCGGCTGAAGAGAACCGCCAGAAGAAGATACACCAGACGGAAGAAC  
CGGATCTGCTATCTGCAAGAGATCTTCAGCAACGAGATGGCCAAGGTGGACGACAGCTTCTTCCACAGACTGGAAGAGTCTTCTCTGG  
TGGAAGAGGATAAGAAGCACGAGCGGCACCCCATCTTCGGCAACATCGTGGACGAGGTGGCCTACCACGAGAAGTACCCACCATCTA  
CCACCTGAGAAAAGAACTGGTGGACAGCACCGACAAGGCGACCTGCGGCTGATCTATCTGGCCCTGGCCACATGATCAAGTTCCGG  
GGCCACTTCTGATCGAGGGCGACCTGAACCCCGACAACAGCGACGTGGACAAGCTGTTTCATCCAGCTGGTGCAGACCTACAACCAGC  
TGTTGAGGAAAACCCATCAACGCCAGCGGCGTGGACGCCAAGGCCATCTGTCTGCCAGACTGAGCAAGACGACGCGGCTGGAAA  
ATCTGATCGCCAGCTGCCCGGCGAGAAGAAGTGGCCTGTTCGAAAACCTGATTGCCCTGAGCCTGGGCTGACCCCAACTTCAA  
GAGCAACTTCGACTGGCCGAGGATGCCAACTGCAGCTGAGCAAGGACACCTACGACGACGACCTGGACAACCTGTGGCCAGAT  
CGGCGACCAGTACGCCGACCTGTTCTGGCCGCAAGAACCTGTCCGACCCATCTGTGAGCGACATCTGAGAGTGAACACCGGAG  
ATCACCAAGGCCCCCTGAGCGCCTCTATGATCAAGAGATACGACGAGCACACCAGGACCTGACCCTGCTGAAAAGCTCTCGTGGCG  
AGCAGCTGCTGAGAAGTACAAAGAGATTTTCTTCGACCAGACAAAGAAGCGCTACGCCGCTACATTGACGGCGGAGCCAGCCAGG  
AAGAGTTTACAAAGTTCATCAAGCCATCTGGAAGAGATGGACGGCACCGAGGAACCTGCTGTAAGCTGAACAGAGAGGACCTGCT  
GCGGAAGCAGCGGACCTTCGACAACGGCAGCATCCCCACCAGATCCACCTGGGAGAGCTGCACGCCATTCTGCGGCGGCAGGAAGA  
TTTTTACCATTCTGAAGGACAACCGGGAAAAGATCGAGAAGATCTGACCTCCGCATCCCTACTACGTGGGCCCTCTGGCCAGGG  
GAAAACAGCAGATTGCGCTGGATGACCAGAAAGAGCGAGGAAACCATCACCCCTGGAACTTCGAGGAAAGTGGTGGACAAGGGCGCTT  
CCGCCAGAGCTTCATCGAGCGGATGACCAACTTCGATAAGAACCTGCCAACGAGAAGGTGCTGCCAAGCACAGCCTGCTGTACGA  
GTACTTACCCTGTATAACGAGCTGACCAAAAGTGAATACGTGACCGAGGGAATGAGAAGGCCCGCTTCTGAGCGGCGAGCAGAAA  
AAGGCCATCGTGGACCTGCTGTCAAGACCAACCGGAAAAGTACCCTGAAGCAGCTGAAAGAGGACTACTTCAAGAAAATCGAGTGT  
TCGACTCCGTGGAATCTCCGGCGTGAAGATCGGTTCAACGCCCTCCCTGGGCACATACCAGATCTGCTGAAAATTATCAAGGACAA  
GGACTTCTGGACAATGAGGAAAACGAGGACATTCTGGAAGATATCGTGTGACCCTGACACTGTTTGAGGACAGAGAGATGATCGAG  
GAACGGCTGAAAACCTATGCCACCTGTTTCGACGACAAGTGTGATGAGCAGCTGAAGCGGCGGAGATACCCGGCTGGGGCAGGCTG  
AGCCGGAAGCTGATCAACGGCATCCGGGACAAGCAGTCCGGCAAGACAATCTGGATTTCCTGAAGTCCGACGGCTTCGCCAACAGAA  
ACTTCATGCAGCTGATCCACGACGACAGCCTGACCTTTAAAGAGGACATCCAGAAAGCCAGGTGTCCGGCCAGGGCGATAGCCTGCA  
CGACACATTGCCAATCTGGCCGGCAGCCCCGCCATTAAGAAGGGCATCTGCAGACAGTGAAGGTGGTGGACGACTCGTGAAGT  
GATGGGCCCGGCACAAGCCCGAGAACATCGTGATCGAAATGGCCAGAGAGAACCAGACCACCCAGAAGGGACAGAAGAACAGCCGGA  
GAGAATGAAGCGGATCGAAGAGGGCATCAAAGAGCTGGGCGAGCCAGATCTGAAAGAACACCCCGTGGAAAACCCAGCTGCAGAA  
CGAGAAGCTGTACTGTACTACCTGCAGAAATGGGCGGATATGTACGTGGACCAGGAACTGGACATCAACCGGCTGTCCGACTACGAT  
GTGGACCATATCGTGCCTCAGAGCTTTCTGAAGGACGACTCCATCGACAACAAGGTGCTGACCAGAAGCGACAAGAACCAGGGCAAG  
AGCGACAACGTGCCCTCCGAAGAGGTCTGTAAGAAGATGAAGAACTACTGGCGGACGCTGTGAACGCCAAGCTGATTACCCAGAGA  
AAGTTCGACAATCTGACCAAGGCCGAGAGAGGGCGCCTGAGCGAACTGGATAAGGCCGGCTTCATCAAGAGACAGCTGGTGGAAACC  
CGGCAGATCACAAGACAGTGGCACAGATCTGGACTCCCGGATGAACACTAAGTACGACGAGAATGACAAGCTGATCCGGGAAGTGA  
AAGTGTACCCCTGAAGTCCAAGCTGGTGTCCGATTTCGGAAAGGATTCCAGTTTTTACAAAAGTGGCGGAGATCAACAACCTACCACC  
GCCACGACGCCTACCTGAACGCCGCTCGTGGAAACCGCCCTGATCAAAAAGTACCCTAAGCTGGAAAGCGAGTTCGTGTACGGGACT  
ACAAGGTGTACGACGTGCGGAAGATGATCGCCAAGAGCGAGCAGGAAATCGGCAAGGCTACCGCCAAGTACTTCTTCTACAGCAACAT  
CATGAACTTTTTCAAGACCGAGATTACCCTGGCCAACGGCGAGATCCGGAAGCGGCTCTGATCGAGACAACCGGCGAAAACCGGGGA  
GATCGTGTGGGATAAGGGCCGGGATTTGCCACCGTGGGAAAAGTGTGAGCATGCCCAAGTGAATATCGTGAAGAAAGACCGAGGTG  
CAGACAGGCGGCTTCAGCAAAAGAGTCTATCTGCCAAAGAGGAAACAGCGATAAGCTGATCGCCAGAAAAGAAGACTGGGACCCTAAGA  
AGTACGGCGGCTTCGACAGCCCCACCGTGGCCTATTCTGTGCTGGTGGCCAAAAGTGGAAAAGGGCAAGTCCAAGAAAAGTGAAGA

GTGTGAAAAGAGCTGCTGGGGATCACCATCATGAAAAGAAAGCAGTTCGAGAAAGAATCCCATCGACTTTCTGGAAGCCAAGGGCTACAA  
AGAAGTAAAAAGGACCTGATCATCAAGCTGCCTAAGTACTCCCTGTTCGAGCTGGAAAACGGCCGGAAGAGAATGCTGGCCTCTGCC  
GGCGAAGTGCAGAAAGGAAACGAAGTGGCCCTGCCCTCCAAATATGTGAACCTTCCTGTACCTGGCCAGCCACTATGAGAAGCTGAAGG  
GCTCCCCGAGGATAATGAGCAGAAACAGCTGTTTGTGGAACAGCACAAGCACTACCTGGACGAGATCATCGAGCAGATCAGCGAGTT  
CTCCAAGAGAGTGATCTGGCCGACGCTAATCTGGACAAAAGTGTGTCCGCTACAACAAGCACCGGGATAAGCCATCAGAGAGCAG  
GCCGAGAATATCATCCACTGTTTACCCTGACCAATCTGGGAGCCCTGCCGCTTCAAGTACTTTGACACCACCATCGACCGGAAGAG  
GTACACCAGCACAAAGAGGTGCTGGACGCCACCCTGATCCACCAGAGCATCACCGCCTGTACGAGACACGGATCGACCTGTCTCAG  
CTGGGAGGCGACAAAAGGCCGGCGCCACGAAAAAGGCCGGCCAGGCAAAAAGAAAAAGTAAGTTAAACGAATTCATAAAAGAT  
CTTIATTTTTCATTAGATCTGTGTGTTGGTTTTTTGTGTGGCCGCTCTAGACCCAGCTTTCTGTACAAAGTTGGCATTAGAGCTCGCGG  
CCGCAAGAACCCCTAGTGATGGAGTTGGCCACTCCCTCTCTGCGCGCTCGCTCGCTCACTGAGGCCGGGGCACCAAAGGTGCCCCGA  
CGCCCGGGCTTTGCCCGGGCGCCTCAGTGAGCGAGCGAGCGCGCAGCTGCCTGCAGG

AAV8-eeCas9:

CTCTCAGGCAGCTGCGCGCTCGCTCGCTCACTGAGGCCGCCCGGCAAGCCCGGGCGTCGGGGACCTTTGGTCGCCCGGCCTCAG  
TGAGCGAGCGAGCGCGCAGAGAGGGAGTGGCCAACCTCCATCACTAGGGGTTCTTCCGGCCGCTAGCGACTCACGGGGATTTCGAAGT  
CTCCACCCCATTGACGTCAATGGGAGTTTGTTTTGGCACCAAAATCAACGGGACTTTCCAAAATGTCGTAACAACCTCCGCCCATTGAC  
GCAAATGGGCGGTAGGCGTGTACGGTGGGAGGTTATATAAGCAGAGCTCGTTTAGTGAACCGTCAGATCCCGCGGCCACCGGTGCCA  
CCATGAGCGACAAACCGAAACGGCCGCTTTCTGCTTACATGCTCTGGCTGAACCTCAGCAGCAGAGAGCATCAAGAGAGAAAATCCCGG  
CATTAAAGTCACTGAGTGGCTAAACCGCGTGGCGAACTTTGAGGGCAATGAAAGATAAGTCCGAGTGGGAGGCCAAGGCGAGCAA  
AGCGAAGGATGACTATGACCGCGCCGTAAGAGGTTTGGGCAATGGGGGTAGCAGCGCGCAAATGGAGGCGCGCGAAGAAAAG  
GGCAAGCCCTGCTAAGAAAAGTTGCTAAGAAGTCTAAAAAGAAAGAAATCAGATGAGGATGATGACGACGAGTCTGAGGCTAGCTCTGGC  
GGATCTAGCGGTGGATCTAGCGGCTCTGAGACCCCTGGAACATCCGAATCCGCCACTCCAGAGAGCAGCGGAGGCTCTCTGGAGGAT  
CACTCGAGGACTATAAGGACCACGACGGAGACTACAAGGATCATGATATTGATTACAAAGACGATGACGATAAGATGGCCCCAAAGAAG  
AAGCGGAAGGTCCGTATCCACGGAGTCCACGACGCCGACAAGAAGTACAGCATCGGCCTGGACATCGGCACCAACTCTGTGGGCTGG  
GCCGTGATCACCAGCAGTACAAGGTGCCAGCAAGAAATCAAGGTGCTGGGCAACACCGACCGGCACAGCATCAAGAAGAACCTG  
ATCGGAGCCCTGCTGTTCTGACAGCGGCGAAACAGCCGAGGCCACCCGGCTGAAAGAGAACCGCCAGAAGAAGATACCCAGACGGGAA  
AACCGGATCTGCTATCTGCAAGAGATCTTACAGCAACGAGATGGCCAAGGTGGACGACAGCTTCTTCCACAGACTGGAAGAGTCCCTCC  
TGGTGGAAAGAGGATAAGAAGCAGGAGCGGCACCCCATCTTCGGCAACATCGTGGACGAGGTGCCTACCACGAGAAGTACCCACCAT  
CTACCACCTGAGAAAAGAACTGGTGGACAGCACCGACAAGGCCGACCTGCGGCTGATCTATCTGGCCCTGGCCACATGATCAAGTTC  
CGGGGCCACTTCTGATCGAGGGCGACCTGAACCCCGACAACAGCGACTGGACAAGCTGTTTATCCAGCTGGTGCAGACCTACAAC  
CAGCTGTTCCGAGAAAACCCCATCAACGCCAGCGCGCTGGACGCCAAGGCCATCCTGTCTGCCAGACTGAGCAAGAGCAGACGGCTG  
GAAAATCTGATCGCCAGCTGCCCGCGGAGAAGAAGAAATGGCCTGTTTCGAAAACCTGATTGCCCTGAGCCTGGGCTGACCCCAACT  
TCAAGAGCAACTTCGACCTGGCCGAGGATGCCAACTGCAGCTGAGCAAGGACACCTACGACGACGACCTGGACAACCTGCTGGCCC  
AGATCGGGGACCACTACGCCGACTGTTTCTGGCCGCAAGAACCTGTCCGACGCCATCTGTGAGCGACATCTGAGAGTGAACAC  
CGAGATCAACAAGGCCCTGAGCGCCTCTATGATCAAGAGATACGACGAGCACCACCAGGACCTGACCCTGCTGAAAGCTCTCGTG  
CGGCAGCAGCTGCCTGAGAAGTACAAAGAGATTTTCTTCGACCAGAGCAAGAACGGCTACGCCGGCTACATTGACGGCGGAGCCAGC  
CAGGAAGAGTTCTACAAGTTCATCAAGCCATCTGGAAGAGATGGACGGCACCGAGGAACTGCTCGTGAAGCTGAAACAGAGAGGAC  
CTGCTGCGGAAGCAGCGGACCTTCGACAAACGGCAGCATCCCCACCAGATCCACCTGGGAGAGCTGCACGCCATTCTGCGCGGCGAG  
GAAGATTTTACCCATTCTGAAGGACAACCGGGAAAAGATCGAGAAGATCTGACCTTCCGCATCCCTACTACGTGGGCCCTCTGGC  
CAGGGGAAACAGCAGATTCCCTGGATGACCAGAAAGAGCGAGGAAACCATCACCCCTGGAACCTCGAGGAAGTGGTGGACAAGGG  
CGCTTCCGCCAGAGCTTATCGAGCGGATGACCAACTTCGATAAGAACCTGCCAACGAGAAGGTGCTGCCAACGACAGCCTGCTG  
TACGAGTACTTACCCTGTATAACGAGCTGACCAAAAGTAAATACGTGACCGAGGGAATGAGAAGGCCCGCTTCTGAGCGGCGAGC  
AGAAAAAGGCCATCGTGGACCTGCTGTTCAAGACCAACCGGAAAAGTACCGTGAAGCAGCTGAAAGAGGACTACTTCAAGAAAATCGA  
GTGCTTCGACTCCGTGGAAATCTCCGGCGTGGAAAGATCGGTTCAACGCCCTCCCTGGGCACATACCACGATCTGCTGAAAATATCAAGG  
ACAAGGACTTCTGGACAATGAGGAAAACGAGGACATCTGGAAGATATCGTGTGACCTGACACTGTTTGGAGACAGAGAGATGAT

CGAGGAACGGCTGAAAACCTATGCCACCTGTTTCGACGACAAAAGTGATGAAGCAGCTGAAGCGGGGAGATACACCGGCTGGGGCAG  
GCTGAGCCGGAAGCTGATCAACGGCATCCGGGACAAGCAGTCCGGCAAGACAATCCTGGATTTCCTGAAGTCCGACGGCTTCGCCAAC  
AGAAACTTCATGCAGCTGATCCACGACGACAGCCTGACCTTTAAAGAGGACATCCAGAAAAGCCAGGTGTCCGGCCAGGGCGATAGCC  
TGCACGAGCACATTGCCAATCTGGCCGGCAGCCCCGCCATTAAGAAGGGCATCCTGCAGACAGTGAAGGTGGTGGACGAGCTCGTGA  
AAGTGATGGGCCGGCACAAGCCCAGAACATCGTGATCGAAATGGCCAGAGAGAACCAGACCACCCAGAAGGGACAGAAGAACAGCC  
CGGAGAGAAATGAAGCGGATCGAAGAGGGCATCAAAGAGCTGGGCAGCCAGATCCTGAAAAGAACCCCGTGGAAAACACCCAGCTGC  
AGAACGAGAAGCTGTACCTGTACTACCTGCAGAATGGGGGGATATGTACGTGGACCAGGAATGGACATCAACCGGCTGTCCGACTA  
CGATGTGGACCATATCGTGCCTCAGAGCTTCTGAAGGACGACTCCATCGACAACAAGGTGTGACCAGAAGCGACAAGAACCAGGGG  
AAGAGCGACAACGTGCCCTCCGAAGAGGTCTGTAAGAAGATGAAGAATACTGGCGGCAGCTGCTGAACGCCAAGCTGATTACCCAG  
AGAAAGTTCGACAATCTGACCAAGGCCGAGAGAGGGCGCTGAGCGAACTGGATAAGGCCGGCTTCATCAAGAGACAGCTGGTGGAA  
ACCCGGCAGATCACAAGCAGCTGGCACAGATCCTGGACTCCCGGATGAACACTAAGTACGACGAGAATGACAAGCTGATCCGGGAAG  
TGAAAGTGATCACCTGAAGTCCAAGCTGGTGTCCGATTTCCGGAAGGATTTCCAGTTTACAAAGTGCAGGATCAACAATAACCAC  
CACGCCACGACGCTACCTGAACGCCGTCGTGGGAACCGCCCTGATCAAAAAGTACCCTAAGCTGGAAAGCGAGTTCGTGTACGGCC  
ACTACAAGGTGTACGACGTGGGAAGATGATCGCCAAGAGCGAGCAGGAAATCGGCAAGGCTACCGCCAAGTACTTCTCTACAGCAA  
CATCATGAACCTTTTCAAGACCGAGATTACCCTGGCCAACGGCGAGATCCGGAAGCGGCTCTGATCGAGACAAACGGCGAAAACGGG  
GAGATCGTGTGGGATAAGGGCCGGGATTTTGCCACCGTGGCGAAAGTGTGAGCATGCCCAAAGTGAATATCGTGA AAAAGACCGGAGG  
TGCAGACAGGGCGGTTTCAGCAAAGAGTCTATCCTGCCAAGAGGAACAGCGATAAGCTGATCGCCAGAAAAGGACTGGGACCTAA  
GAAGTACGGCGGCTTCGACAGCCCCACCGTGGCTATTCTGTGTGGTGGTGGCCAAAAGTGAAAAGGGCAAGTCCAAGAACTGAA  
GAGTGTGAAAGAGCTGCTGGGGATCACCATCATGAAAAGAAGCAGCTTCGAGAAGAATCCCATCGACTTCTGGGAAGCCAAGGGCTAC  
AAAGAAGTGA AAAAGGACCTGATCATCAAGCTGCCTAAGTACTCCCTGTTCGAGCTGGAAAACGGCCGAAGAGAATGCTGGCCTCTG  
CCGGCGAACTGCAGAAGGGAAACGAACTGGCCCTGCCCTCCAAATATGTGAACTTCTGTACCTGGCCAGCCACTATGAGAAGCTGAA  
GGGTCCCCCGAGGATAATGAGCAGAAAACAGCTGTTTGTGGAACAGCACAAGCACTACTTGGACGAGATCATCGAGCAGATCAGCGAG  
TTCTCCAAGAGAGTGATCCTGGCCAGCTAATCTGGACAAAAGTGTGTCCGCCACACAAGCACCGGGATAAGCCATCAGAGAGC  
AGGCCGAGAATATCATCCACTGTTTACCCTGACCAATCTGGGAGCCCTGCCGCCTTCAAGTACTTTGACACCACCATCGACCGGAAG  
AGGTACACCAGCACAAAAGAGGTGCTGGACGCCACCCTGATCCACCAGGCATCACCAGGCTGTACGAGACACGGATCGACCTGTCTC  
AGCTGGGAGGCGACAAAAGGCCGGCCAGCAAAAAGGCCGGCCAGGCAAAAAGAAAAGTAAAGTTTAAACGAATTCATAAAAAG  
ATCTTTATTTTATTAGATCTGTGTGGTGGTTTTTGTGTGGCGCCGCTAGACCCAGCTTTCTGTACAAAAGTTGGCATTAGAGCTCGC  
GGCCGCAGGAACCCCTAGTGTGGAGTTGGCCACTCCCTCTGTGCGGCTCGCTCGCTCACTGAGGCCGGGCGACCAAGGTGCGCC  
GACGCCGGGCTTTGCCCGGGCGGCTCAGTGAGCGAGCGAGCGCGCAGCTGCCTGCAGG
